1 Title: Slope of the power spectral density flattens at low frequencies (<150 Hz) with healthy  
2 aging but also steepens at higher frequency (>200 Hz) in human electroencephalogram

3

4 Abbreviated title: PSD slope flattens and steepens in different bands with age

5

6 Authors: Srishty Aggarwal<sup>1</sup> and Supratim Ray<sup>2\*</sup>

7

8 Affiliations:

9 <sup>1</sup>Department of Physics, Indian Institute of Science, Bengaluru, India, 560012,

10 <sup>2</sup>Centre for Neuroscience, Indian Institute of Science, Bengaluru, India, 560012,

11 Telephone +91 80 2293 3437, Facsimile +91 80 2360 3323

12 \* Corresponding author: [sray@iisc.ac.in](mailto:sray@iisc.ac.in)

13

14 Keywords: EEG, aperiodic activity, healthy aging, Alzheimer's Disease, alpha oscillation,  
15 high frequency

16 Number of figures: 6

17 Number of tables: 1

18 Number of words in abstract: 250

19 Number of words in introduction: 583

20 Number of words in discussion: 1526

21 Declaration of interests: The authors declare no competing financial interests.

22 Funding disclosure and Acknowledgements: This work was supported by Tata Trusts Grant  
23 and Wellcome Trust/DBT India Alliance (Senior fellowship IA/S/18/2/504003) to SR) and

24 Prime Minister Research Fellowship to SA.

25 **Abstract**

26 Brain signals such as electroencephalogram (EEG) often show oscillations at various  
27 frequencies, which are represented as distinct “bumps” in the power spectral density (PSD) of  
28 these signals. In addition, the PSD also shows a distinct reduction in power with increasing  
29 frequency, which pertains to aperiodic activity and is often termed as the “1/f” component.  
30 While a change in periodic activity in brain signals with healthy aging and mental disorders  
31 has been reported, recent studies have shown a reduction in the slope of the aperiodic activity  
32 with these factors as well. However, these studies only analysed PSD slopes over a limited  
33 frequency range (<100 Hz). To test whether the PSD slope is affected over a wider frequency  
34 range with aging and mental disorder, we collected EEG data with high sampling rate (2500  
35 Hz) from a large population of elderly subjects (>49 years) who were healthy (N=217) or had  
36 mild cognitive impairment (MCI; N=11) or Alzheimer’s Disease (AD; N=5), and analysed  
37 the PSD slope till 800 Hz. Consistent with previous studies, the 1/f slope up to ~150 Hz  
38 reduced with healthy aging. Surprisingly, we found the opposite at higher frequencies (>200  
39 Hz): the slope increased with age. This result was observed in all electrodes, for both eyes  
40 open and eyes closed conditions, and for different reference schemes. Slopes were not  
41 significantly different in MCI/AD subjects compared to age and gender matched healthy  
42 controls. Overall, our results constrain the biophysical mechanisms that are reflected in the  
43 PSD slopes in healthy and pathological aging.

#### 44 **Significance Statement**

45 Aperiodic activity in the brain is characterized by measuring the slope of the power spectrum  
46 of brain signals. This slope has been shown to flatten with healthy aging, suggesting an  
47 increase in some sort of “neural noise”. However, this flattening has been observed only over  
48 a limited frequency range (<150 Hz). We found that at higher frequencies (>200 Hz), the  
49 opposite happens: the slope steepens with age. This occurs at all electrodes, irrespective of  
50 state and referencing techniques. However, the slope is unchanged in subjects with early  
51 Alzheimer’s Disease (AD) and their controls. Our results shed new light on the properties of  
52 neural noise and the neurophysiological processes affecting AD and the aperiodic activity.

## 53 **Introduction**

54 Neural signals such as electroencephalography (EEG), magnetoencephalography (MEG),  
55 electrocorticography (ECoG) and local field potential (LFP) provide critical insights into the  
56 physiological processes underlying key aspects of human cognition and neurodevelopment.  
57 These signals often reveal oscillations at different frequencies, which are represented as  
58 “bumps” in the power spectral density (PSD), and have been extensively studied as an  
59 objective measure for cognitive phenotyping (Klimesch, 1999; Schutter and Knyazev, 2012),  
60 biomarkers for age (Başar, 2013; Murty et al., 2020) as well as neurological disorders  
61 (Newson and Thiagarajan, 2018; Murty et al., 2021). In addition, the aperiodic background  
62 activity in the signals, often known as the ‘1/f component’ or ‘scale-free activity’, is  
63 characterized by the slope or exponent of the PSD (on a log-log scale) in a specified  
64 frequency band (He, 2014).

65 The PSD slope has garnered interest in recent years, as has been shown to be one of the key  
66 features of signal variability (Ribeiro and Castelo-Branco, 2022) and has been related to  
67 N900 lexical prediction (Dave et al., 2018), working memory (Donoghue et al., 2020b),  
68 grammar learning (Cross et al., 2022), sleep changes (Bódizs et al., 2021), anaesthesia  
69 (Kreuzer et al., 2020) and EEG fingerprinting (Demuru and Fraschini, 2020). The slope has  
70 been suggested to depend on multiple factors that include excitation-inhibition balance  
71 (Freeman and Zhai, 2009; Gao et al., 2017), dendritic response to an input (Voytek and  
72 Knight, 2015), tissue properties (Bédard et al., 2006a), temporal dynamics of the synaptic  
73 processes triggered by Poisson spiking (Milstein et al., 2009) and ionic diffusion processes  
74 across the extracellular membrane (Bédard and Destexhe, 2009). More recently, it has been  
75 linked to the “neural noise” hypothesis ((Voytek et al., 2015); more details in the Discussion  
76 section).

77 Change in aperiodic activity is suggested to be a plausible biomarker for some neurological  
78 and psychiatric diseases like schizophrenia (Molina et al., 2020), attention deficit  
79 hyperactivity disorder (ADHD; (Robertson et al., 2019; Ostlund et al., 2021)) and Fragile X  
80 Syndrome (Wilkinson and Nelson, 2021), although the aperiodic activity was unchanged in  
81 other diseases such as Alzheimer's Disease (AD) (Benwell et al., 2020; Springer et al., 2022).  
82 Recently, reduction in the slope with increasing age has been observed across several studies  
83 under different task paradigms (Voytek et al., 2015; Dave et al., 2018; Tran et al., 2020) or  
84 even in resting state conditions (Thuwal et al., 2021; Hill et al., 2022; Merkin et al., 2023).  
85 However, slope analysis in these studies has been restricted to frequency ranges below 125  
86 Hz, with most of them only up to 50 Hz. Indeed, very few reports have studied the PSD  
87 slopes in EEG at frequencies above 150 Hz (Dehghani et al., 2010; Moffett et al., 2017), but  
88 the effect of aging or mental disorder on the PSD slopes at these frequencies is unknown.  
89 However, the oscillations in high frequency range (300-500 Hz) also exhibit age dependant  
90 changes (Hume et al., 1982; Tanosaki et al., 1999), which prompted us to investigate the  
91 aperiodic activity in these frequency ranges.

92 In this study, we explored aperiodic activity in the resting state EEG activity up to 800 Hz in  
93 healthy elderly subjects aged 50-88 years. We analysed the slopes in both eyes open and eyes  
94 closed states. Eyes closed state enabled us to minimize potential electromyography (EMG)  
95 artifacts that could be present in eyes open state. We further examined the dependence of  
96 slopes on the reference schemes. Finally, we compared the slopes in subjects with mild  
97 cognitive impairment (MCI) and early AD with their age and gender matched healthy  
98 controls.

## 99 **Materials and Methods**

100 The details of experimental setup and data collection have been explained in detail in  
101 previous studies (Murty et al., 2020, 2021; Kumar et al., 2022); here, we summarize them  
102 briefly.

### 103 **Dataset**

104 We used the EEG dataset collected from 257 human subjects (109 females) aged 50-88 years  
105 (Murty et al., 2020, 2021) under Tata Longitudinal Study of Aging (TLSA) who were  
106 recruited from the urban communities of Bengaluru, Karnataka, India. They were clinically  
107 diagnosed by psychiatrists, psychologists and neurologists at National Institute of Mental  
108 Health and Neurosciences (NIMHANS), and M.S. Ramaiah Hospital, Bengaluru as  
109 cognitively healthy (N = 236), or with MCI (N = 15) or AD (N = 6), using a combination of  
110 tests such as Clinical Dementia Rating scale (CDR), Addenbrook's Cognitive Examination-  
111 III (ACE-III), and Hindi Mental State Examination (HMSE). Diagnosis of all MCI/AD  
112 subjects was reviewed by a panel of four experts who reclassified two MCI subjects as  
113 healthy. Data from these two subjects were not taken for analyses. Further, 11 (10 healthy  
114 and 1 MCI) subjects were discarded due to noise (See Artifact Rejection subsection). One  
115 AD patient was further discarded as there was no age and gender matched control. We further  
116 discarded another 10 subjects (9 healthy and 1 MCI) for whom data was collected using 32  
117 channels, leading to the usable 64-channel data of 233 subjects (217 healthy, 11 MCI and 5  
118 AD). The eyes closed data (see the next subsection) was not collected from 16 subjects (13  
119 healthy, 2 MCI and 1 AD) leading to a slightly smaller dataset for eyes closed condition.

120 Informed consent was obtained from the participants of the study and monetary compensation  
121 was provided. All the procedures were approved by The Institute Human Ethics Committees  
122 of Indian Institute of Science, NIMHANS, and M.S. Ramaiah Hospital, Bengaluru.

### 123 **Experimental Settings and Behavioural task**

124 Briefly, EEG was recorded from 64-channel active electrodes (actiCap) using BrainAmp DC  
125 EEG acquisition system (Brain Products GmbH). The electrodes were placed according to  
126 the international 10–10 system, referenced online at FCz. Raw signals were filtered online  
127 between 0.016 Hz (first-order filter) and 1 kHz (fifth-order Butterworth filter), sampled at 2.5  
128 kHz, and digitized at 16-bit resolution (0.1  $\mu$ V/bit). The subjects were asked to sit in a dark  
129 room in front of a gamma corrected LCD monitor (BenQ XL2411; dimensions: 20.92  $\times$   
130 11.77 inches; resolution: 1280  $\times$  720 pixels; refresh rate: 100 Hz) with their heads supported  
131 by a chin rest. It was placed at (mean  $\pm$  SD) 58  $\pm$  0.7 cm from the subjects (range: 54.9–61.0  
132 cm) and subtended 52°  $\times$  30° of visual field for full screen gratings. Eye position was  
133 monitored using EyeLink 1000 (SR Research Ltd), sampled at 500 Hz.

134 In the beginning of the experiment, the resting state EEG for the eyes closed condition was  
135 collected for 1-2 minutes. Then, the subjects performed a passive visual fixation task,  
136 including the full screen grating stimuli. The task consisted of a single session that lasted for  
137 ~20 min, divided in 2–3 blocks with 3–5 min breaks in between, according to subjects'  
138 comfort. Every trial started with the onset of a fixation spot (0.1°) shown at the centre of the  
139 screen, on which they were instructed to fixate. After an initial blank period of 1000 ms, 2–3  
140 full screen grating stimuli were presented for 800 ms with an interstimulus interval of 700 ms  
141 using a customized software running on MAC OS. The stimuli were full contrast sinusoidal  
142 luminance achromatic gratings with either of the 3 spatial frequencies (1, 2, and 4 cycles per  
143 degree (cpd)) and 4 orientations (0°, 45°, 90°, and 135°). Our analyses were restricted to 500

144 ms of the interstimulus period before the onset of the stimulus, referred as the baseline period  
145 in the previous studies (Murty et al., 2020, 2021). We refer to it as “eyes open” condition.

146

### 147 **Artifact Rejection**

148 For eyes open data, we used the artifact rejection framework as described in (Murty et al.,  
149 2020, 2021; Murty and Ray, 2022) and the steps are summarised here.

150 (a) Eye-blinks or change in eye position outside a 5° fixation window during  $-0.5$  s to  $0.75$  s  
151 from stimulus onset were noted as fixation breaks and removed offline. This led to a  
152 rejection of  $14.6 \pm 2.8\%$  (mean  $\pm$  SD) repeats.

153 (b) All the electrodes with impedance  $>25$  k $\Omega$  were rejected. Impedance of final set of  
154 electrodes was (mean  $\pm$  SD)  $5.48 \pm 1.83$  k $\Omega$ .

155 (c) In the remaining electrodes, outliers were detected as repeats with deviation from the  
156 mean signal in (i) time or (ii) frequency domains by more than 6 standard deviations, and  
157 subsequently electrodes with more than 30% outliers were discarded.

158 (d) Further, repeats that were deemed bad in the visual electrodes (P3, P1, P2, PO3, POz,  
159 PO4, O1, Oz and O2) or in more than 10% of the other electrodes were considered bad,  
160 eventually yielding a set of common bad repeats for each subject.

161 Overall, this led us to reject (mean  $\pm$  SD)  $15.58 \pm 5.48\%$  repeats.

162 (e) We computed slopes for the power spectrum between 56 Hz and 84 Hz range for each  
163 unipolar electrode and rejected electrodes whose slopes were less than 0.

164 Overall, it led to a rejection of  $(19.45 \pm 14.64\%)$  electrodes.



165 (f) We found that a small fraction of electrodes/stimulus repeats had either very small or very  
166 large signals that were not getting discarded using the pipeline above. Therefore, in  
167 addition to the artifact detection pipeline that was used in the previous studies, for each  
168 electrode, we computed the root mean square value (RMS) of the time series for all the  
169 remaining trials (after removing common bad repeats using the above criteria), and  
170 declared repeats having RMS values lower than  $1.25 \mu\text{V}$  or higher than  $35 \mu\text{V}$  as new  
171 outliers. We then rejected the electrodes that had more than 30% new outliers. Further,  
172 any new outlier if it belonged to the visual electrodes or was common in more than 10%  
173 of other electrodes was considered a bad repeat and appended to the existing list of bad  
174 repeats.

175 This led to rejection of additional  $1.24 \pm 1.72$  electrodes and  $0.16 \pm 1.05\%$  repeats. This  
176 condition was added mainly to improve power spectral density (PSD) plots unlike the  
177 previous studies (Murty et al., 2020, 2021; Kumar et al., 2022) that dealt mainly with  
178 change in power. The main results remained similar even without applying this new  
179 criterion.

180 (g) We further discarded the blocks which did not have at least a single good unipolar  
181 electrode in the left visual anterolateral (P3, P1, PO3, O1), right visual anterolateral (P2,  
182 P4, PO4, O2) and posteromedial (POz, Oz) electrode groups. We then pooled data across  
183 all good blocks for every subject separately for final analysis.

184 Those subjects who did not have any analyzable blocks (10/237 healthy and 1/15 MCI)  
185 were discarded for further analysis.

186 The eyes closed EEG data was segmented into non-overlapping 2s epochs, resulting in a  
187 higher resolution of 0.5 Hz. Each segment was then treated as a “stimulus repeat” and  
188 subjected to the same artifact rejection pipeline as the eyes open data, with minor changes as

189 described below. We only considered subjects who were deemed good for the eyes open  
190 condition. Then, we started with step (b) above, yielding the average impedance of  $5.47$   
191  $\pm 1.77$  k $\Omega$ . We then applied the RMS criteria in place of deviation from mean signal in time  
192 domain in (c). Since, we were applying RMS criteria at an initial step on the raw data  
193 containing the outliers, we had to increase the lower cut off to  $2.5$   $\mu$ V and keep the upper cut  
194 off same. We repeated the remaining steps for artifact rejection done for eyes open from c (ii)  
195 – (e), i.e., detection of outliers from standard deviation in frequency domain to rejection of  
196 electrodes with slopes less than 0 as described above. It led to exclusion of  $(3.11\% \pm 4.87\%)$   
197 repeats and  $(18.86\% \pm 13.10\%)$  electrodes. No additional subject was rejected when we  
198 applied the criteria in (g) for eyes closed data.

199 After discarding all the bad repeats,  $(293.42 \pm 67.22)$  and  $(39.35 \pm 7.75)$  repeats were  
200 available for eyes open and eyes closed conditions, respectively.

## 201 **EEG Data Analysis**

202 Our primary emphasis was to characterize slope of the aperiodic activity in the PSD as a  
203 function of age within the elderly population ( $>49$  years), for which we divided these subjects  
204 into two groups: 50–64 years (Mid) and  $>64$  years (Old), as depicted in Table 1. We also  
205 compared the slopes in subjects with AD/MCI (termed “cases”) with their healthy, age and  
206 gender matched controls. As in our previous studies (Murty et al., 2021; Kumar and Ray,  
207 2023), for each case, we averaged the relevant metrics for all age ( $\pm 1$  year) and gender  
208 matched controls to yield a single control data point for each case, yielding 16 (13) pairs for  
209 eyes open (eyes closed) analyses (Table 1).

210 All the data analyses were done using custom codes written in MATLAB (MathWorks. Inc;  
211 RRID:SCR\_001622). Similar to the previous studies (Murty et al., 2020, 2021; Kumar et al.,

212 2022) on this dataset, we chose [-500 0] ms as the eyes open period, yielding a resolution of  
213 2 Hz. The analyses were performed using unipolar reference scheme, unless otherwise  
214 specified. Power spectrum was obtained using the Chronux Toolbox ((Bokil et al., 2010),  
215 RRID:SCR\_005547) for individual trials and then averaged across the trials for each  
216 electrode.

### 217 *Slope Analysis*

218 The slope of the 1/f aperiodic component of the spectral distribution was computed using the  
219 Matlab wrapper for Fitting Oscillations and One Over f (FOOOF) toolbox (Donoghue et al.,  
220 2020b). In FOOOF, the power spectrum  $P(f)$  for frequency  $f$  is modelled as a combination of  
221 aperiodic  $AP(f)$  and oscillatory components and can be expressed as:

$$P(f) = AP(f) + \sum_n G_n(f).$$

222 The  $AP(f)$  is given by

$$AP(f) = 10^b f^{-\chi},$$

223 where  $\chi$  is the exponent or ‘slope’ and  $b$  is the offset. Each oscillatory contribution  $G_n(f)$  is  
224 modelled as a Gaussian peak:

$$G_n(f) = a_n \exp\left[-\frac{(f - \mu_n)^2}{2\sigma_n^2}\right],$$

225 with  $a_n$  as the peak height,  $\mu_n$  as the centre frequency and  $\sigma_n$  as the width of each  
226 component. The settings chosen for FOOOF model parameters were: peak width limits: [4 8]  
227 for eyes open and [1 8] for eyes closed (different values were used to account for differences

228 in frequency resolution in the two datasets); maximum number of peaks: 5; minimum peak  
229 height: 0.2; peak threshold: 2.0; and aperiodic mode: ‘fixed’.

230 In our data, peaks in the PSD were only evident in the alpha range (8-12 Hz) and line noise  
231 (50 Hz) and its harmonics. By taking a frequency range which did not include these  
232 oscillatory frequencies (or by not considering these frequencies for analysis), the slope can  
233 also be estimated by simply fitting a straight line to  $\log(P(f))$  versus  $\log(f)$  plot, as done in a  
234 previous study (Shirhatti et al., 2016). We employed least square minimization using the  
235 program *fminsearch* in Matlab to obtain the slope, which gave similar results to the slopes  
236 estimated using FOOOF.

237 Since the slope does not remain constant throughout the full frequency range (Shirhatti et al.,  
238 2016), we fitted the PSD segments in frequency ranges from 4 to 1000 Hz in steps of 20 Hz  
239 with centre frequency between 40 Hz and 960 Hz, having the frequency width of 100 Hz. The  
240 PSD segments with the lowest and highest centre frequencies had slightly smaller frequency  
241 range width owing to frequency limit of 4-1000 Hz. We also fitted a single slope in the low  
242 frequency range (LFR) (64-140 Hz) and the high frequency range (HFR) (230-430 Hz) to  
243 verify that the trend in slope is not attributable to a particular frequency range width and  
244 length of PSD segments. Note that FOOOF has a limitation that if the frequency range to be  
245 fitted has peaks at its ends, the evaluated slope is inappropriate (Gerster et al., 2022). To  
246 overcome this limitation, we declared  $\pm 4$  Hz around the peaks corresponding to the line  
247 noise at 50 Hz and its harmonics as “noise peaks”, and avoided frequency ranges for which  
248 these noise peaks lay near their end points. We also did not use slopes that were less than  
249 0.01, which may be due to poor fitting.

250 *Linear Regression*

251 The slope was modelled to vary linearly with age. We used *fitlm* function in Matlab that  
252 generates the model parameters  $\beta_1, \beta_2$  corresponding to  $y = \beta_1 + \beta_2 * x$ , R-squared ( $R^2$ )  
253 and p-value using t-statistics.

#### 254 *Electrode Grouping*

255 Scalp maps were generated using the topoplot function of EEGLAB toolbox ((Delorme and  
256 Makeig, 2004), RRID:SCR\_007292) with standard *Acticap 64* unipolar montage of the  
257 channels. We divided the electrodes into 5 groups as occipital (O1, Oz, O2, PO3, PO4, PO7,  
258 PO8, PO9, PO10, POz), centro-parietal (CP1, CP2, CP3, CP4, CP5, CP6, CPz, P1, P2, P3,  
259 P4, P5, P6, P7, P8, Pz), fronto-central (FC1, FC2, FC3, FC4, FC5, FC6, C1, C2, C3, C4, C5,  
260 C6, Cz), frontal (Fp1, Fp2, F1, F2, F3, F4, F5, F6, F7, F8, Fz, AF3, AF4, AF7, AF8) and  
261 temporal (T7, T8, TP7, TP8, TP9, TP10, FT7, FT8, FT9, FT10). FCz and Fpz were used as  
262 the reference and the ground respectively. In our previous studies (Murty et al., 2020, 2021;  
263 Kumar et al., 2022), power analysis was done on electrodes for which strong gamma power  
264 was observed (P3, P1, P2, PO3, POz, PO4, O1, Oz and O2), which were termed as “high  
265 priority” electrodes. We performed slope analysis on this group as well.

#### 266 **Statistical Analysis**

267 The statistical analysis was done for slope comparison. Kruskal-Wallis (K-W) test, Wilcoxon  
268 rank sum (WRS) test were used to compare the medians across groups. The standard error of  
269 median (SEM) was computed after bootstrapping over 10,000 iterations.

270 To remove false alarms created by low p-values at certain frequencies, we applied cluster  
271 correction (Cohen, 2014). We used *bwconncomp* function of Image Processing toolbox in  
272 matlab to identify the frequency clusters having p-values less than 0.05 and 0.01. We called a  
273 cluster significant if at least three consecutive frequency bins were significant.

274 **Data and Code Availability**

275 All spectral analyses were performed using Chronux toolbox (version 2.10), available at  
276 <http://chronux.org>. Slopes were obtained using matlab wrapper for FOOF  
277 ([https://github.com/foof-tools/foof\\_mat](https://github.com/foof-tools/foof_mat)). Raw data will be made available to readers upon  
278 reasonable request and made publicly available at a later time.

## 279 **Results**

280 We examined EEG data for 237 healthy adults aged between 50 and 88 years, grouped as  
281 Mid (50-64 years; N=90) and Old (>64 years; N=127). The subjects sat with their eyes closed  
282 for 1-2 minutes before performing a fixation task in which full-screen gratings were  
283 presented for 800 ms with an inter-stimulus interval of 700 ms. We computed the PSD of 500  
284 ms segments of data during interstimulus period to get the “eyes open” condition, yielding a  
285 frequency resolution of 2 Hz. To overcome the plausible electromyography (EMG) artifacts  
286 in eyes open state, we also analysed the eyes closed data with segments of 2 s each, which  
287 yielded a higher resolution of 0.5 Hz. We computed the slopes using Matlab wrapper for  
288 Fitting Oscillations and One Over f (FOOOF) toolbox (Donoghue et al., 2020b), in steps of  
289 20 Hz between 4 and 1000 Hz with centre frequencies from 40 Hz to 960 Hz by taking PSD  
290 segments of  $\pm 50$  Hz around each centre frequency. The first and the last PSD segments were  
291 slightly smaller owing to frequency limit of 4-1000 Hz. Slopes less than 0.01 were not  
292 considered for analysis. (See materials and methods). We have shown the PSDs and slopes up  
293 to 800 Hz to avoid the influence of filter roll off caused by a fifth order Butterworth filter at  
294 1000 Hz.

### 295 *Slopes vary differently with age in low and high frequency regimes*

296 Figure 1A shows the median PSDs and slopes with frequencies for the mid and old groups for  
297 the eyes open condition for the “high-priority” electrode group (see Methods for details).  
298 Like the slope variation in LFP data in monkeys (Shirhatti et al., 2016), for both age groups,  
299 slope was high initially due to the presence of oscillatory activities and decreased beyond ~60  
300 Hz until ~140 Hz. It then increased again after a “knee” at ~175 Hz (see bottom plot in Fig.  
301 1A). The PSDs flattened out for old subjects than mid aged subjects from ~50 Hz until ~140  
302 Hz, resulting in lower slopes for the former in the low frequency range (LFR) 64-140 Hz, as

303 highlighted by yellow boxes. This is in consensus with the results reported previously  
304 (Voytek et al., 2015; Merkin et al., 2023). However, beyond ~200 Hz the trend reversed and  
305 the PSDs for old subjects became steeper, resulting in steeper slopes beyond ~200 Hz up to  
306 ~700 Hz. The high frequency range (HFR) at 230-430 Hz, marked in orange, highlights the  
307 prominent region of higher slopes for the old group.

308 Since the frequency resolution for the eyes open condition was 2 Hz, and there could be some  
309 EMG activity related to maintenance of fixation, we also studied the slopes when eyes were  
310 closed for which longer segments of data were used to get a frequency resolution of 0.5 Hz  
311 (Fig. 1B). This condition revealed a more prominent alpha peak as compared to the eyes open  
312 condition, and also showed a well-known slowing of the alpha wave with aging (Sally et al.,  
313 2018; Merkin et al., 2023), with the centre frequency reducing from  $9.72 \pm 0.11$  in mid to  
314  $9.41 \pm 0.09$  in old aged group ( $p=0.008$ , WRS test). Importantly, the flattening of slope in  
315 LFR and steepening in HFR with age was also observed in this dataset (Fig. 1B, bottom  
316 panel).

317 To better quantify the factors that could lead to the change in PSDs, we first compared the  
318 change in PSD between mid and old groups by subtracting the log PSD plots for the two  
319 conditions shown in Figures 1A and 1B (and multiplying by 10 to get units of decibels;  
320 Figure 1C). Since power is subtracted on a log scale, it is simply the log of the ratio of  
321 powers, and therefore, represents the scaling factor that must be applied on the PSD for the  
322 mid group to obtain the PSD for the old group. This log ratio was negative (scaling factor  $<1$ )  
323 below ~50 Hz, and subsequently became positive with a peak between 100-200 Hz. This ratio  
324 was smaller for the eyes closed condition in the LFR but comparable in the HFR.

325 We also considered an additive noise hypothesis in which noise was added to the signal  
326 obtained from the mid group to get the signal for the old group. If the noise at any frequency



327 is independent of the signal, the power is additive, such that the power of the required noise  
328 can be obtained by simply subtracting the PSDs but on a linear (rather than log as done in  
329 Fig. 1C) scale (Fig. 1D). This also yielded a shallow “bump” between 50 Hz – 500 Hz  
330 peaking at around ~100 Hz (values below ~50 Hz are negative due to a reduction of alpha  
331 and beta power with aging). As in Figure 1C, noise power was lower in LFR for eyes closed  
332 than eyes open condition, potentially reflecting some contribution of EMG which is  
333 prominent between 40-200 Hz (Muthukumaraswamy, 2013; McManus et al., 2020).  
334 However, this “noise” was comparable in HFR range for the two conditions.

### 335 *Age variation of slope in LFR and HFR is observed in all electrodes*

336 Next, we compared the slopes for different sensors, for which the electrodes were grouped in  
337 five categories as mentioned in Materials and Methods. Figure 2A shows the PSDs and  
338 slopes in all the electrode groups for eyes open condition. Interestingly, the PSD slopes  
339 varied considerably depending on electrode location over the entire frequency range. Figure  
340 2C shows the fitted slopes in LFR and HFR. In particular, in HFR, the slopes increased  
341 radially from the central area.

342 In spite of the differences in absolute slope values, the difference in slope between old and  
343 mid aged groups showed consistent trends (Fig. 2B). The difference in slopes between old  
344 and mid groups in LFR (Fig. 2C; top plot) and HFR (Fig. 2C; bottom plot) were consistently  
345 negative and positive, respectively. The electrodes for which the differences were significant  
346 ( $p < 0.05$ , Wilcoxon rank sum (WRS) test; red dots in Fig. 2C) were more concentrated in the  
347 posterior and occipital electrodes. Figure 2D shows the median value of the slopes in two age  
348 groups in LFR (top) and HFR (bottom), which were significantly different in all electrode  
349 groups ( $p$ -values are shown in the plots). The results were similar when the analysis was  
350 restricted to only males or females (data not shown). Similar analyses were performed for

351 eyes closed state as shown in Figure 3. The results in eyes closed state were similar to the  
352 eyes open state, although the differences in slopes between the age groups (Fig. 3C) were less  
353 prominent and only significant in the occipital area for HFR (Figs. 3C and D).

#### 354 *Slope variation across electrodes is independent of the reference scheme*

355 In HFR, the slopes were lower for the central electrodes and increased across frontal,  
356 temporal and occipital areas (Figs. 2C and 3C; bottom panels). In our recording setup, the  
357 reference and ground electrodes were near the centre, and therefore, the radial increase in  
358 slopes in HFR could be due to an increase with the distance of the electrode from the  
359 reference electrode. To test the dependence of HFR slope on the reference scheme, we re-  
360 referenced all signals using a bipolar referencing scheme in which each electrode was  
361 referenced with respect to a neighbouring electrode to yield a virtual bipolar electrode at the  
362 mid-point of the two electrodes, yielding 112 bipolar-referenced electrodes (for more details,  
363 see (Murty et al., 2020)). Figure 4 shows the same results as Figure 2C after computing the  
364 slopes for the bipolar signals. The results after bipolar referencing remained similar, thus,  
365 repudiating the variation across electrodes as an artifact, although the absolute slopes for  
366 bipolar reference scheme were slightly lower than unipolar reference scheme, as also shown  
367 previously (Shirhatti et al., 2016).

#### 368 *Slopes do not vary between AD/MCI patients and their controls*

369 We compared the PSDs and slopes in AD/MCI subjects with their age and gender matched  
370 healthy controls. As in our previous studies (Murty et al., 2021; Kumar and Ray, 2023), we  
371 averaged the PSDs/slopes across all controls for a given case subject to match the number of  
372 cases and controls. Figure 5 shows the results for the eyes closed condition (N=13). The  
373 PSDs revealed a significant reduction in beta power (15-35 Hz) in cases compared to controls  
374 in all the electrode groups as reported in other studies (Ranasinghe et al., 2022). For example,

375 it reduced from  $12.14 \pm 1.56 \mu V^2$  and  $11.18 \pm 1.32 \mu V^2$  in controls to  $5.83 \pm 1.16 \mu V^2$  and  $5.78$   
376  $\pm 1.24 \mu V^2$  in cases in occipital and temporal electrodes ( $p=0.0048$  and  $0.0066$ , WRS test),  
377 respectively. This reduction was observed in the eyes open condition also ( $N=16$ ), although it  
378 did not reach significance (data not shown). However, there was no significant change in  
379 slopes between controls and cases in either LFR or HFR in either eyes open and eyes closed  
380 conditions (eyes closed: Fig. 5B-D), consistent with previous studies which also did not find  
381 any changes in PSD slope with MCI/AD (Benwell et al., 2020; Springer et al., 2022).

### 382 *Variation in slope with age is confirmed using regression analysis*

383 To confirm the variation in slope across subjects without grouping them in predefined groups,  
384 we regressed the slopes in the high priority electrode group with age (See Material and  
385 Methods for details) for the two frequency ranges and the two conditions, as shown in Figure  
386 6. Consistent with previous results, we observed a negative relationship in LFR (slope= $-0.010$   
387 for eyes open and  $-0.013$  for eyes closed) and a positive relationship in HFR (slope= $0.017$  for  
388 eyes open and  $0.016$  for eyes closed). Interestingly, slope magnitude in HFR was higher than  
389 LFR, indicating a faster change of slope with age in HFR. Also,  $R^2$  was higher in HFR ( $0.53$   
390 eyes open,  $0.46$  eyes closed) than LFR ( $0.36$  eyes open,  $0.30$  eyes closed). All the changes  
391 were significant (LFR:  $p=0.0007$  eyes open,  $p=0.0001$  eyes closed; HFR:  $p=0.0002$  eyes  
392 open,  $p=0.0001$  eyes closed). There was nearly equal distribution of AD/MCI cases, shown as  
393 pink dots, around the regression line indicating the indifference of their slopes with healthy  
394 subjects in both LFR and HFR for eyes open as well as eyes closed conditions.

395

## 396 **Discussion**

397 We investigated age and MCI/AD related changes in the resting state aperiodic activity by  
398 studying the variation in the slope of the PSD over a broad frequency range (up to 800 Hz).  
399 In a task where subjects maintained fixation on the screen while visual stimuli were presented  
400 (Murty et al., 2020, 2021), we computed the PSDs during the inter-stimulus interval period.  
401 Consistent with previous studies, PSD slope flattened with age up to ~150 Hz. However, the  
402 slope showed a surprising increase with age at frequencies beyond 200 Hz. This age-related  
403 distinct behaviour of slopes at low and high frequency ranges was observed in all sensors,  
404 although, the slopes varied with sensor location. These results were confirmed using another  
405 dataset from the same subjects when they sat quietly with their eyes closed, for which PSDs  
406 could be obtained at higher frequency resolution. This ruled out the possibility of potential  
407 EMG artifacts related to open eyes or poor frequency resolution in the eyes open data  
408 affecting our results. The results remained similar when we used a bipolar reference scheme  
409 instead of the original unipolar reference scheme. Further, although we observed a reduction  
410 in beta power in subjects with MCI or AD compared to their age and gender matched healthy  
411 controls, we did not find any significant change in slopes.

### 412 *Previous studies on PSD slope changes with age*

413 Voytek and colleagues first showed the reduction in the slope of the PSD in older (60-70  
414 years) participants compared to younger (20-30 years) in a visual working memory task  
415 (Voytek et al., 2015), which has now been confirmed in several studies involving a task  
416 paradigm (Dave et al., 2018; Tran et al., 2020; Ribeiro and Castelo-Branco, 2022) as well as  
417 in resting state data (Hill et al., 2022; Merkin et al., 2023). However, all these studies dealt  
418 with frequencies less than 120 Hz, for example, 2-24 Hz (Voytek et al., 2015), 2-20 Hz (Tran  
419 et al., 2020), 1-40 Hz (Hill et al., 2022) and 2-40 Hz (Merkin et al., 2023). In our data, PSDs

420 were largely overlapping up to ~50 Hz (Fig. 1), potentially because our analysis was limited  
421 to the elderly population between 50-90 years, as opposed to a wider gap in age groups in  
422 other studies (for example, 20-30 versus 60-70 in (Voytek et al., 2015) and 18-35 versus 50-  
423 86 years in (Merkin et al., 2023)). We therefore chose a slightly higher frequency range of  
424 64-140 Hz (LFR) in which the PSD flattening could be easily observed in the PSDs, and 230-  
425 430 Hz (HFR) in which steepening of PSD was easily noticed.

#### 426 *Neural mechanisms underlying PSD slope changes*

427 Although precise generative mechanisms underlying aperiodic activity is unknown, a  
428 multitude of factors have been suggested to describe the slopes, that include tissue properties  
429 (Bédard et al., 2006a), self-organized criticality (SOC) (He et al., 2010; Chaudhuri et al.,  
430 2018), filtering properties of dendrites and extracellular medium (Bédard et al., 2006b;  
431 Logothetis et al., 2007; Bédard and Destexhe, 2009) and excitation-inhibition (E/I) balance  
432 (Gao et al., 2017; Naskar et al., 2021). In addition, the PSD slopes depend on simple factors  
433 such as the reference scheme used for recording the data (Shirhatti et al., 2016).

434 Recently, a “neural noise” hypothesis has been proposed to explain the reduction in the PSD  
435 slope, which is related with increased asynchronous background neuronal firing (Voytek et  
436 al., 2015) or an increase in E/I ratio (Gao et al., 2017). Specifically, Gao and colleagues  
437 developed a model in which Poisson distributed spikes arriving at excitatory and inhibitory  
438 neurons generated a change in excitatory and inhibitory conductance that were modelled as a  
439 difference-of-exponentials due to rise and decay time constants associated with AMPA and  
440 GABA<sub>A</sub> receptors. Both these conductance profiles produced a low-pass effect, but slower  
441 kinetics of GABA<sub>A</sub> caused a steeper roll-off with frequency compared to the AMPA  
442 conductance (see Fig. 1 of (Gao et al., 2017)). Consequently, reduction in inhibition (increase  
443 in E/I ratio), potentially due to dysfunctional inhibitory circuitry with aging, led to shallower

444 slopes. This hypothesis has been supported by experiments in which the PSD slope was  
445 modulated by administration of drugs that led to either increased inhibition (e. g., propofol)  
446 or increased excitation (ketamine) (Gao et al., 2017; Lendner et al., 2020; Waschke et al.,  
447 2021). Our results could be consistent with this hypothesis, provided we modify the  
448 characteristics of this neural noise, which was band-pass as shown in Figure 1D.

449 Interestingly, surface EMG signals have energy between 40-200 Hz, peaking around ~100  
450 Hz, which could explain at least part of the slope changes in the LFR (Muthukumaraswamy,  
451 2013; McManus et al., 2020). On the other hand, this cannot explain the effect in steepening  
452 of the slope in HFR, since the noise was similar whether eyes were open or closed and  
453 occurred at a higher frequency range than EMG activity. Indeed, the noise need not be  
454 myogenic but instead generated by the brain. As the timescales of fundamental neural  
455 processes like synaptic neurotransmitter diffusion time and timing of spike propagation lie  
456 below 10 ms (Sabatini and Regehr, 1996; Shepherd, 2004), high frequency activity (>100  
457 Hz) contains a wealth of information about neural processing and integration. Hence, the  
458 increase in slope in old group in HFR could be a reflection of age-related changes in these  
459 neural processes. In addition, it could be due to age-related alteration of physiological  
460 properties in brain tissue (Aalami et al., 2003; Lee and Kim, 2022), cortical thickness (Lillie  
461 et al., 2016) and skin conductance (Lim et al., 1996; Venables and Mitchell, 1996), which  
462 could determine the amplitude of this high-frequency signal measured from the scalp.

#### 463 ***Variation in PSDs slopes with frequency and electrode location***

464 The PSD slopes in our study varied considerably depending on the frequency range (Fig. 1),  
465 similar to what we observed in LFP data in a previous study (see Fig. 1 of (Shirhatti et al.,  
466 2016)). We discuss some of these reasons below.

467 The initial high slope below 60 Hz as shown in Figures 1, 2, 3 and 5 may be due to the  
468 presence of the oscillatory activity that may have persisted even after accounting for the  
469 oscillatory power using FOOOF. The periodic activity in theta and alpha frequency range has  
470 been shown to be correlated with the aperiodic activity computed in the similar frequency  
471 range (Donoghue et al., 2020a). Also, researchers have stressed upon the need of removing  
472 the oscillations before computing the slopes indicating disruption of aperiodic activity in the  
473 low frequency ranges (Merkin et al., 2023). At lower frequencies, the slopes are also heavily  
474 dependent on the reference scheme (Shirhatti et al., 2016).

475 The dip in slope between 100-200 Hz and subsequent increase beyond 200 Hz reflects the  
476 presence of a “knee” in the PSD. This “knee” has been observed in previous studies as well,  
477 albeit at a different frequency. Miller and colleagues (Miller et al., 2009) found a knee in  
478 their ECoG PSD at ~75 Hz and attributed it to post-synaptic potential current of a particular  
479 timescale. In our data, the knee was present at ~175 Hz in all the electrode groups except the  
480 frontal group (where it was at ~100 Hz) and was prominent in occipital and temporal regions.  
481 This resulted in a timescale of ~5ms, computed as  $1/2\pi f_{knee}$ ,  $f_{knee}$  being the knee frequency.  
482 This timescale of ~5ms may be due to post-synaptic current, tissue low pass filter (Miller et  
483 al., 2009) or characteristic initial adaptation period of pyramidal neurons (Rauch et al., 2003).

484 The surprising result of the dependence of the PSD slope on electrode location at high  
485 frequencies, which has been observed previously (Dehghani et al., 2010), could be due to  
486 inhomogeneity of skull thickness or conductivity (Law, 1993; McCann et al., 2019). Future  
487 measurement of regional conductivity and its relation to PSD slope would be helpful to shed  
488 light on this issue.

489 ***PSD slope changes with neurological disorders***

490 Previous studies have shown a reduction in low-frequency oscillatory activity as well as  
491 stimulus-induced gamma activity in MCI/AD subjects (Benwell et al., 2020; Murty et al.,  
492 2021; Ranasinghe et al., 2022), which we also found in our dataset. Since neurological  
493 disorders are often associated with E/I imbalance (Lauterborn et al., 2021), and E/I ratio  
494 affects PSD slopes (Gao et al., 2017), we expected a change in PSD slope in MCI/AD  
495 subjects as well, but we found a null result. It could be due to a small sample size, although  
496 we found significant differences in power at both low-frequencies (Figure 5) and in the  
497 gamma band (Murty et al., 2021) with the same sample size. Further, this null result is  
498 consistent with previously documented MEG observations (Benwell et al., 2020; Springer et  
499 al., 2022). This suggests that the relationship between PSD slope and E/I balance could be  
500 complicated and dependent on other factors, as discussed above. Given that some other  
501 mental disorders have been shown to change the PSD slope (Molina et al., 2020), slope  
502 analysis could be used to distinguish between AD and other disorders. Future research related  
503 to how HFR slope varies with anaesthesia or other manipulations to change E/I balance will  
504 help elucidate its underlying mechanisms, and shed light on the neurobiology of aging in  
505 healthy and pathological brain.



## 506 **References**

- 507 Aalami OO, Fang TD, Song HM, Nacamuli RP (2003) Physiological Features of Aging Persons. Archives  
508 of Surgery 138:1068–1076 Available at: <https://doi.org/10.1001/archsurg.138.10.1068>  
509 [Accessed February 7, 2023].
- 510 Bařar E (2013) A review of gamma oscillations in healthy subjects and in cognitive impairment.  
511 International Journal of Psychophysiology 90:99–117 Available at:  
512 <https://www.sciencedirect.com/science/article/pii/S0167876013002134> [Accessed January  
513 18, 2023].
- 514 Bédard C, Destexhe A (2009) Macroscopic Models of Local Field Potentials and the Apparent 1/f  
515 Noise in Brain Activity. Biophysical Journal 96:2589–2603 Available at:  
516 <https://www.sciencedirect.com/science/article/pii/S0006349509004147> [Accessed January  
517 19, 2023].
- 518 Bédard C, Kröger H, Destexhe A (2006a) Does the  $1/f$  Frequency Scaling of Brain Signals Reflect  
519 Self-Organized Critical States? Phys Rev Lett 97:118102 Available at:  
520 <https://link.aps.org/doi/10.1103/PhysRevLett.97.118102> [Accessed January 19, 2023].
- 521 Bédard C, Kröger H, Destexhe A (2006b) Model of low-pass filtering of local field potentials in brain  
522 tissue. Phys Rev E 73:051911 Available at:  
523 <https://link.aps.org/doi/10.1103/PhysRevE.73.051911> [Accessed January 19, 2023].
- 524 Benwell CSY, Davila-Pérez P, Fried PJ, Jones RN, Trivison TG, Santarnecchi E, Pascual-Leone A, Shafi  
525 MM (2020) EEG spectral power abnormalities and their relationship with cognitive  
526 dysfunction in patients with Alzheimer’s disease and type 2 diabetes. Neurobiol Aging  
527 85:83–95.
- 528 Bódizs R, Szalárdy O, Horváth C, Ujma PP, Gombos F, Simor P, Pótári A, Zeising M, Steiger A, Dresler  
529 M (2021) A set of composite, non-redundant EEG measures of NREM sleep based on the  
530 power law scaling of the Fourier spectrum. Sci Rep 11:2041 Available at:  
531 <https://www.nature.com/articles/s41598-021-81230-7> [Accessed January 19, 2023].
- 532 Bokil H, Andrews P, Kulkarni JE, Mehta S, Mitra PP (2010) Chronux: a platform for analyzing neural  
533 signals. J Neurosci Methods 192:146–151.
- 534 Chaudhuri R, He BJ, Wang X-J (2018) Random Recurrent Networks Near Criticality Capture the  
535 Broadband Power Distribution of Human ECoG Dynamics. Cerebral Cortex 28:3610–3622  
536 Available at: <https://academic.oup.com/cercor/article/28/10/3610/4508768> [Accessed  
537 January 22, 2023].
- 538 Cohen MX (2014) Analyzing neural time series data: theory and practice. Cambridge, Massachusetts:  
539 The MIT Press.
- 540 Cross ZR, Corcoran AW, Schlesewsky M, Kohler MJ, Bornkessel-Schlesewsky I (2022) Oscillatory and  
541 Aperiodic Neural Activity Jointly Predict Language Learning. Journal of Cognitive  
542 Neuroscience 34:1630–1649 Available at: [https://doi.org/10.1162/jocn\\_a\\_01878](https://doi.org/10.1162/jocn_a_01878) [Accessed  
543 January 19, 2023].

- 544 Dave S, Brothers TA, Swaab TY (2018) 1/f Neural Noise and Electrophysiological Indices of Contextual  
545 Prediction in Aging. *Brain Res* 1691:34–43 Available at:  
546 <https://www.ncbi.nlm.nih.gov/pmc/articles/PMC5965691/> [Accessed January 19, 2023].
- 547 Dehghani N, Bédard C, Cash SS, Halgren E, Destexhe A (2010) Comparative power spectral analysis of  
548 simultaneous electroencephalographic and magnetoencephalographic recordings in humans  
549 suggests non-resistive extracellular media. *J Comput Neurosci* 29:405–421 Available at:  
550 <https://www.ncbi.nlm.nih.gov/pmc/articles/PMC2978899/> [Accessed February 7, 2023].
- 551 Delorme A, Makeig S (2004) EEGLAB: an open source toolbox for analysis of single-trial EEG dynamics  
552 including independent component analysis. *J Neurosci Methods* 134:9–21.
- 553 Demuru M, Fraschini M (2020) EEG fingerprinting: Subject-specific signature based on the aperiodic  
554 component of power spectrum. *Computers in Biology and Medicine* 120:103748 Available  
555 at: <https://linkinghub.elsevier.com/retrieve/pii/S001048252030127X> [Accessed January 19,  
556 2023].
- 557 Donoghue T, Dominguez J, Voytek B (2020a) Electrophysiological Frequency Band Ratio Measures  
558 Conflate Periodic and Aperiodic Neural Activity. *eNeuro* 7 Available at:  
559 <https://www.eneuro.org/content/7/6/ENEURO.0192-20.2020> [Accessed January 19, 2023].
- 560 Donoghue T, Haller M, Peterson EJ, Varma P, Sebastian P, Gao R, Noto T, Lara AH, Wallis JD, Knight  
561 RT, Shestyuk A, Voytek B (2020b) Parameterizing neural power spectra into periodic and  
562 aperiodic components. *Nat Neurosci* 23:1655–1665 Available at:  
563 <https://www.nature.com/articles/s41593-020-00744-x> [Accessed January 19, 2023].
- 564 Freeman WJ, Zhai J (2009) Simulated power spectral density (PSD) of background electrocorticogram  
565 (ECoG). *Cogn Neurodyn* 3:97–103.
- 566 Gao R, Peterson EJ, Voytek B (2017) Inferring synaptic excitation/inhibition balance from field  
567 potentials. *NeuroImage* 158:70–78 Available at:  
568 <https://www.sciencedirect.com/science/article/pii/S1053811917305621> [Accessed January  
569 19, 2023].
- 570 Gerster M, Waterstraat G, Litvak V, Lehnertz K, Schnitzler A, Florin E, Curio G, Nikulin V (2022)  
571 Separating Neural Oscillations from Aperiodic 1/f Activity: Challenges and  
572 Recommendations. *Neuroinform* 20:991–1012 Available at:  
573 <https://link.springer.com/10.1007/s12021-022-09581-8> [Accessed January 20, 2023].
- 574 He BJ (2014) Scale-free brain activity: past, present, and future. *Trends in Cognitive Sciences* 18:480–  
575 487 Available at: <https://www.sciencedirect.com/science/article/pii/S1364661314000850>  
576 [Accessed January 22, 2023].
- 577 He BJ, Zempel JM, Snyder AZ, Raichle ME (2010) The temporal structures and functional significance  
578 of scale-free brain activity. *Neuron* 66:353–369.
- 579 Hill AT, Clark GM, Bigelow FJ, Lum JAG, Enticott PG (2022) Periodic and aperiodic neural activity  
580 displays age-dependent changes across early-to-middle childhood. *Developmental Cognitive*  
581 *Neuroscience* 54:101076 Available at:  
582 <https://linkinghub.elsevier.com/retrieve/pii/S1878929322000202> [Accessed January 19,  
583 2023].

- 584 Hume AL, Cant BR, Shaw NA, Cowan JC (1982) Central somatosensory conduction time from 10 to 79  
585 years. *Electroencephalogr Clin Neurophysiol* 54:49–54.
- 586 Klimesch W (1999) EEG alpha and theta oscillations reflect cognitive and memory performance: a  
587 review and analysis. *Brain Research Reviews* 29:169–195 Available at:  
588 <https://www.sciencedirect.com/science/article/pii/S0165017398000563> [Accessed January  
589 18, 2023].
- 590 Kreuzer M, Stern MA, Hight D, Berger S, Schneider G, Sleight JW, García PS (2020) Spectral and  
591 Entropic Features Are Altered by Age in the Electroencephalogram in Patients under  
592 Sevoflurane Anesthesia. *Anesthesiology* 132:1003–1016 Available at:  
593 [https://pubs.asahq.org/anesthesiology/article/132/5/1003/108947/Spectral-and-Entropic-  
594 Features-Are-Altered-by-Age](https://pubs.asahq.org/anesthesiology/article/132/5/1003/108947/Spectral-and-Entropic-Features-Are-Altered-by-Age) [Accessed January 19, 2023].
- 595 Kumar WS, Manikandan K, Murty DVPS, Ramesh RG, Purokayastha S, Javali M, Rao NP, Ray S (2022)  
596 Stimulus-Induced Narrowband Gamma Oscillations are Test–Retest Reliable in Human EEG.  
597 *Cereb Cortex Commun* 3:tgab066 Available at:  
598 <https://www.ncbi.nlm.nih.gov/pmc/articles/PMC8790174/> [Accessed November 29, 2022].
- 599 Kumar WS, Ray S (2023) Healthy aging and cognitive impairment alter EEG functional connectivity in  
600 distinct frequency bands. :2023.01.24.525301 Available at:  
601 <https://www.biorxiv.org/content/10.1101/2023.01.24.525301v1> [Accessed February 7,  
602 2023].
- 603 Lauterborn JC, Scaduto P, Cox CD, Schulmann A, Lynch G, Gall CM, Keene CD, Limon A (2021)  
604 Increased excitatory to inhibitory synaptic ratio in parietal cortex samples from individuals  
605 with Alzheimer’s disease. *Nat Commun* 12:2603 Available at:  
606 <https://www.nature.com/articles/s41467-021-22742-8> [Accessed February 10, 2023].
- 607 Law SK (1993) Thickness and resistivity variations over the upper surface of the human skull. *Brain*  
608 *Topogr* 6:99–109 Available at: <https://doi.org/10.1007/BF01191074> [Accessed February 9,  
609 2023].
- 610 Lee J, Kim H-J (2022) Normal Aging Induces Changes in the Brain and Neurodegeneration Progress:  
611 Review of the Structural, Biochemical, Metabolic, Cellular, and Molecular Changes. *Frontiers*  
612 *in Aging Neuroscience* 14 Available at:  
613 <https://www.frontiersin.org/articles/10.3389/fnagi.2022.931536> [Accessed February 9,  
614 2023].
- 615 Lendner JD, Helfrich RF, Mander BA, Romundstad L, Lin JJ, Walker MP, Larsson PG, Knight RT (2020)  
616 An electrophysiological marker of arousal level in humans Haegens S, Colgin LL, Piantoni G,  
617 eds. *eLife* 9:e55092 Available at: <https://doi.org/10.7554/eLife.55092> [Accessed January 19,  
618 2023].
- 619 Lillie EM, Urban JE, Lynch SK, Weaver AA, Stitzel JD (2016) Evaluation of Skull Cortical Thickness  
620 Changes With Age and Sex From Computed Tomography Scans. *Journal of Bone and Mineral*  
621 *Research* 31:299–307 Available at:  
622 <https://onlinelibrary.wiley.com/doi/abs/10.1002/jbmr.2613> [Accessed February 8, 2023].
- 623 Lim CL, Barry RJ, Gordon E, Sawant A, Rennie C, Yiannikas C (1996) The relationship between  
624 quantified EEG and skin conductance level. *International Journal of Psychophysiology*  
625 21:151–162 Available at:

- 626 <https://www.sciencedirect.com/science/article/pii/S0167876095000496> [Accessed February  
627 9, 2023].
- 628 Logothetis NK, Kayser C, Oeltermann A (2007) In vivo measurement of cortical impedance spectrum  
629 in monkeys: implications for signal propagation. *Neuron* 55:809–823.
- 630 McCann H, Pisano G, Beltrachini L (2019) Variation in Reported Human Head Tissue Electrical  
631 Conductivity Values. *Brain Topogr* 32:825–858 Available at:  
632 <https://www.ncbi.nlm.nih.gov/pmc/articles/PMC6708046/> [Accessed February 9, 2023].
- 633 McManus L, De Vito G, Lowery MM (2020) Analysis and Biophysics of Surface EMG for  
634 Physiotherapists and Kinesiologists: Toward a Common Language With Rehabilitation  
635 Engineers. *Front Neurol* 11:576729 Available at:  
636 <https://www.frontiersin.org/article/10.3389/fneur.2020.576729/full> [Accessed February 8,  
637 2023].
- 638 Merkin A, Sghirripa S, Graetz L, Smith AE, Hordacre B, Harris R, Pitcher J, Semmler J, Rogasch NC,  
639 Goldsworthy M (2023) Do age-related differences in aperiodic neural activity explain  
640 differences in resting EEG alpha? *Neurobiology of Aging* 121:78–87 Available at:  
641 <https://www.sciencedirect.com/science/article/pii/S0197458022002019> [Accessed  
642 December 14, 2022].
- 643 Miller KJ, Sorensen LB, Ojemann JG, Nijss M den (2009) Power-Law Scaling in the Brain Surface  
644 Electric Potential. *PLOS Computational Biology* 5:e1000609 Available at:  
645 <https://journals.plos.org/ploscompbiol/article?id=10.1371/journal.pcbi.1000609> [Accessed  
646 December 16, 2022].
- 647 Milstein J, Mormann F, Fried I, Koch C (2009) Neuronal Shot Noise and Brownian 1/f<sup>2</sup> Behavior in the  
648 Local Field Potential. *PLOS ONE* 4:e4338 Available at:  
649 <https://journals.plos.org/plosone/article?id=10.1371/journal.pone.0004338> [Accessed  
650 January 19, 2023].
- 651 Moffett SX, O’Malley SM, Man S, Hong D, Martin JV (2017) Dynamics of high frequency brain activity.  
652 *Sci Rep* 7:15758 Available at: <https://www.ncbi.nlm.nih.gov/pmc/articles/PMC5693956/>  
653 [Accessed December 7, 2022].
- 654 Molina JL, Voytek B, Thomas ML, Joshi YB, Bhakta SG, Talledo JA, Swerdlow NR, Light GA (2020)  
655 Memantine Effects on Electroencephalographic Measures of Putative Excitatory/Inhibitory  
656 Balance in Schizophrenia. *Biol Psychiatry Cogn Neurosci Neuroimaging* 5:562–568.
- 657 Murty DV, Manikandan K, Kumar WS, Ramesh RG, Purokayastha S, Nagendra B, ML A, Balakrishnan  
658 A, Javali M, Rao NP, Ray S (2021) Stimulus-induced gamma rhythms are weaker in human  
659 elderly with mild cognitive impairment and Alzheimer’s disease Vinck M, Colgin LL, Bosman  
660 CA, eds. *eLife* 10:e61666 Available at: <https://doi.org/10.7554/eLife.61666> [Accessed  
661 November 29, 2022].
- 662 Murty DVPS, Manikandan K, Kumar WS, Ramesh RG, Purokayastha S, Javali M, Rao NP, Ray S (2020)  
663 Gamma oscillations weaken with age in healthy elderly in human EEG. *NeuroImage*  
664 215:116826 Available at:  
665 <https://www.sciencedirect.com/science/article/pii/S105381192030313X> [Accessed  
666 November 28, 2022].

- 667 Murty DVPS, Ray S (2022) Stimulus-induced Robust Narrow-band Gamma Oscillations in Human EEG  
668 Using Cartesian Gratings. *Bio Protoc* 12:e4379.
- 669 Muthukumaraswamy SD (2013) High-frequency brain activity and muscle artifacts in MEG/EEG: a  
670 review and recommendations. *Front Hum Neurosci* 7 Available at:  
671 <http://journal.frontiersin.org/article/10.3389/fnhum.2013.00138/abstract> [Accessed  
672 January 28, 2023].
- 673 Naskar A, Vattikonda A, Deco G, Roy D, Banerjee A (2021) Multiscale dynamic mean field (MDMF)  
674 model relates resting-state brain dynamics with local cortical excitatory–inhibitory  
675 neurotransmitter homeostasis. *Network Neuroscience* 5:757–782 Available at:  
676 [https://doi.org/10.1162/netn\\_a\\_00197](https://doi.org/10.1162/netn_a_00197) [Accessed January 22, 2023].
- 677 Newson JJ, Thiagarajan TC (2018) EEG Frequency Bands in Psychiatric Disorders: A Review of Resting  
678 State Studies. *Front Hum Neurosci* 12:521.
- 679 Ostlund BD, Alperin BR, Drew T, Karalunas SL (2021) Behavioral and cognitive correlates of the  
680 aperiodic (1/f-like) exponent of the EEG power spectrum in adolescents with and without  
681 ADHD. *Developmental Cognitive Neuroscience* 48:100931 Available at:  
682 <https://www.sciencedirect.com/science/article/pii/S1878929321000220> [Accessed January  
683 19, 2023].
- 684 Ranasinghe KG, Verma P, Cai C, Xie X, Kudo K, Gao X, Lerner H, Mizuiri D, Strom A, Iaccarino L, La Joie  
685 R, Miller BL, Gorno-Tempini ML, Rankin KP, Jagust WJ, Vossel K, Rabinovici GD, Raj A,  
686 Nagarajan SS (2022) Altered excitatory and inhibitory neuronal subpopulation parameters  
687 are distinctly associated with tau and amyloid in Alzheimer’s disease Slutsky I, Chin J, Maestú  
688 F, eds. *eLife* 11:e77850 Available at: <https://doi.org/10.7554/eLife.77850> [Accessed January  
689 22, 2023].
- 690 Rauch A, La Camera G, Luscher H-R, Senn W, Fusi S (2003) Neocortical pyramidal cells respond as  
691 integrate-and-fire neurons to in vivo-like input currents. *J Neurophysiol* 90:1598–1612.
- 692 Ribeiro M, Castelo-Branco M (2022) Slow fluctuations in ongoing brain activity decrease in amplitude  
693 with ageing yet their impact on task-related evoked responses is dissociable from behavior  
694 O’Connell RG, Gold JI, O’Connell RG, Schölvinck M, eds. *eLife* 11:e75722 Available at:  
695 <https://doi.org/10.7554/eLife.75722> [Accessed January 19, 2023].
- 696 Robertson MM, Furlong S, Voytek B, Donoghue T, Boettiger CA, Sheridan MA (2019) EEG power  
697 spectral slope differs by ADHD status and stimulant medication exposure in early childhood.  
698 *J Neurophysiol* 122:2427–2437.
- 699 Sabatini BL, Regehr WG (1996) Timing of neurotransmission at fast synapses in the mammalian  
700 brain. *Nature* 384:170–172 Available at: <https://www.nature.com/articles/384170a0>  
701 [Accessed February 12, 2023].
- 702 Scally B, Burke MR, Bunce D, Delvenne J-F (2018) Resting-state EEG power and connectivity are  
703 associated with alpha peak frequency slowing in healthy aging. *Neurobiol Aging* 71:149–155.
- 704 Schutter DJLG, Knyazev GG (2012) Cross-frequency coupling of brain oscillations in studying  
705 motivation and emotion. *Motiv Emot* 36:46–54.

- 706 Shepherd GM (2004) *The Synaptic Organization of the Brain*. Oxford University Press. Available at:  
707 [https://global.oup.com/academic/product/the-synaptic-organization-of-the-brain-](https://global.oup.com/academic/product/the-synaptic-organization-of-the-brain-9780195159561?cc=in&lang=en)  
708 [9780195159561?cc=in&lang=en](https://global.oup.com/academic/product/the-synaptic-organization-of-the-brain-9780195159561?cc=in&lang=en) [Accessed February 12, 2023].
- 709 Shirhatti V, Borthakur A, Ray S (2016) Effect of Reference Scheme on Power and Phase of the Local  
710 Field Potential. *Neural Computation* 28:882–913 Available at:  
711 [https://direct.mit.edu/neco/article/28/5/882/8159/Effect-of-Reference-Scheme-on-Power-](https://direct.mit.edu/neco/article/28/5/882/8159/Effect-of-Reference-Scheme-on-Power-and-Phase-of)  
712 [and-Phase-of](https://direct.mit.edu/neco/article/28/5/882/8159/Effect-of-Reference-Scheme-on-Power-and-Phase-of) [Accessed January 19, 2023].
- 713 Springer SD, Wiesman AI, May PE, Schantell M, Johnson HJ, Willett MP, Castelblanco CA, Eastman JA,  
714 Christopher-Hayes NJ, Wolfson SL, Johnson CM, Murman DL, Wilson TW (2022) Altered  
715 visual entrainment in patients with Alzheimer’s disease: magnetoencephalography evidence.  
716 *Brain Communications* 4:fcac198 Available at:  
717 <https://academic.oup.com/braincomms/article/doi/10.1093/braincomms/fcac198/6652979>  
718 [Accessed January 25, 2023].
- 719 Tanosaki M, Ozaki I, Shimamura H, Baba M, Matsunaga M (1999) Effects of aging on central  
720 conduction in somatosensory evoked potentials: evaluation of onset versus peak methods.  
721 *Clin Neurophysiol* 110:2094–2103.
- 722 Thuwal K, Banerjee A, Roy D (2021) Aperiodic and Periodic Components of Ongoing Oscillatory Brain  
723 Dynamics Link Distinct Functional Aspects of Cognition across Adult Lifespan. *eNeuro*  
724 8:ENEURO.0224-21.2021 Available at:  
725 <https://www.ncbi.nlm.nih.gov/pmc/articles/PMC8547598/> [Accessed December 7, 2022].
- 726 Tran TT, Rolle CE, Gazzaley A, Voytek B (2020) Linked sources of neural noise contribute to age-  
727 related cognitive decline. *J Cogn Neurosci* 32:1813–1822 Available at:  
728 <https://www.ncbi.nlm.nih.gov/pmc/articles/PMC7474516/> [Accessed January 19, 2023].
- 729 Venables PH, Mitchell DA (1996) The effects of age, sex and time of testing on skin conductance  
730 activity. *Biological Psychology* 43:87–101 Available at:  
731 <https://www.sciencedirect.com/science/article/pii/0301051196051836> [Accessed February  
732 8, 2023].
- 733 Voytek B, Knight RT (2015) Dynamic Network Communication as a Unifying Neural Basis for  
734 Cognition, Development, Aging, and Disease. *Biological Psychiatry* 77:1089–1097 Available  
735 at: <https://www.sciencedirect.com/science/article/pii/S0006322315003546> [Accessed  
736 January 19, 2023].
- 737 Voytek B, Kramer MA, Case J, Lepage KQ, Tempesta ZR, Knight RT, Gazzaley A (2015) Age-Related  
738 Changes in 1/f Neural Electrophysiological Noise. *Journal of Neuroscience* 35:13257–13265  
739 Available at: <https://www.jneurosci.org/lookup/doi/10.1523/JNEUROSCI.2332-14.2015>  
740 [Accessed January 19, 2023].
- 741 Waschke L, Donoghue T, Fiedler L, Smith S, Garrett DD, Voytek B, Obleser J (2021) Modality-specific  
742 tracking of attention and sensory statistics in the human electrophysiological spectral  
743 exponent Chait M, Shinn-Cunningham BG, Postle BR, Simon JZ, eds. *eLife* 10:e70068  
744 Available at: <https://doi.org/10.7554/eLife.70068> [Accessed January 19, 2023].
- 745 Wilkinson CL, Nelson CA (2021) Increased aperiodic gamma power in young boys with Fragile X  
746 Syndrome is associated with better language ability. *Molecular Autism* 12:17 Available at:  
747 <https://doi.org/10.1186/s13229-021-00425-x> [Accessed January 19, 2023].

## 749 **Figures**

750 **Figure 1:** (A) PSDs (top) and slopes (bottom) for the two age groups in high priority  
751 electrodes in eyes open state. Solid traces represent the median and shaded region around  
752 them indicates  $\pm$ SEM across subjects, computed after bootstrapping over 10,000 iterations.  
753 The numbers in legend in the top panel represent the subjects in the respective age groups.  
754 Coloured bars at the abscissa in the bottom panel represent significance of differences of  
755 slopes between mid and old (black:  $p < 0.05$  and green:  $p < 0.01$ , K-W test, Cluster Corrected  
756 (CC)). Yellow and orange boxes represent the LFR (64-140 Hz) and the HFR (230-430 Hz)  
757 respectively. (B) Same as (A) in eyes closed condition. (C) The median change in power  
758 between mid and old in decibels (dB) for eyes open (purple) and eyes closed (grey)  
759 conditions. (D) Median change in absolute power between mid and old for these two  
760 conditions.

761 **Figure 2. Variation of PSDs and slopes with frequency across the two age groups for**  
762 **different electrodes for the eyes open state.** (A) PSDs and slopes across different electrode  
763 groups for mid and old age groups. The topoplot in the left bottom panel highlights the  
764 electrodes chosen for each electrode group. (B) PSDs and slopes between the age groups for  
765 each electrode group separately. Solid traces represent the median and shaded region around  
766 them indicates  $\pm$ SEM across subjects, computed after bootstrapping over 10,000 iterations.  
767 The numbers in legend in the top panel represent the subjects in the respective age groups.  
768 Coloured bars at the abscissa in the bottom panel represent significance of differences of  
769 slopes between mid and old (black:  $p < 0.05$  and green:  $p < 0.01$ , K-W test (CC)). Yellow and  
770 orange boxes represent the LFR (64-140 Hz) and the HFR (230-430 Hz) respectively in (A)  
771 and (B). (C) Topoplot of the difference in slopes between old and mid age groups (left  
772 column), computed in LFR (top row) and HFR (bottom row), and the raw slope values in the

773 mid (central column) and old (right column) age groups. Electrodes with significant  
774 difference ( $p < 0.05$ , WRS test) in slopes are highlighted in red in the left panel. (D) Bar plots  
775 showing median slopes for each electrode group for mid and old aged people for LFR and  
776 HFR, with error bars representing standard error of median (obtained using bootstrapping).  
777 The WRS test p-values are indicated at the top of the bar plots and the dots represent the  
778 slope for each subject.

779 **Figure 3. Variation of PSDs and slopes with frequency across the two age groups in**  
780 **various areas of brain for eyes closed state.** Same as Figure 2 but for the eyes closed  
781 condition.

782 **Figure 4.** Same as Figure 2C but for bipolar reference scheme.

783 **Figure 5. Comparison of PSDs and slopes with frequency between controls and cases**  
784 **(AD/MCI) for eyes closed state.** (A)-(C) are similar to Figure 2A-C. Since there were  
785 several controls per case, median PSDs/slopes across all controls for each case subject was  
786 used to match the numbers of cases and controls. (D) The bar plots show the median slope for  
787 each electrode group in LFR and HFR across controls and cases. Individual case and control  
788 pair are shown as connected white dots. The WRS test p-values are indicated on the top of the  
789 bar plots.

790 **Figure 6. Scatter plots showing the slopes in high priority electrodes for all subjects in**  
791 **LFR and HFR for baseline and eyes closed conditions.** Blue dots represent healthy  
792 subjects while MCI and AD subjects are indicated using pink dots. The regression line is in  
793 red and the corresponding parameters obtained using regression analysis are shown in top  
794 right side of each subplot.

795



796 **Tables**

|             | Mid<br>(50-64 years) | Old<br>(>64 years) | MCI    | AD    |
|-------------|----------------------|--------------------|--------|-------|
| Eyes open   | 90 (50)              | 127 (48)           | 11 (2) | 5 (2) |
| Eyes closed | 82 (45)              | 122 (48)           | 9 (1)  | 4 (2) |

797

798 **Table 1:** Number of subjects in each group for the eyes open and eyes closed conditions. The

799 numbers in parenthesis indicate the female subjects.

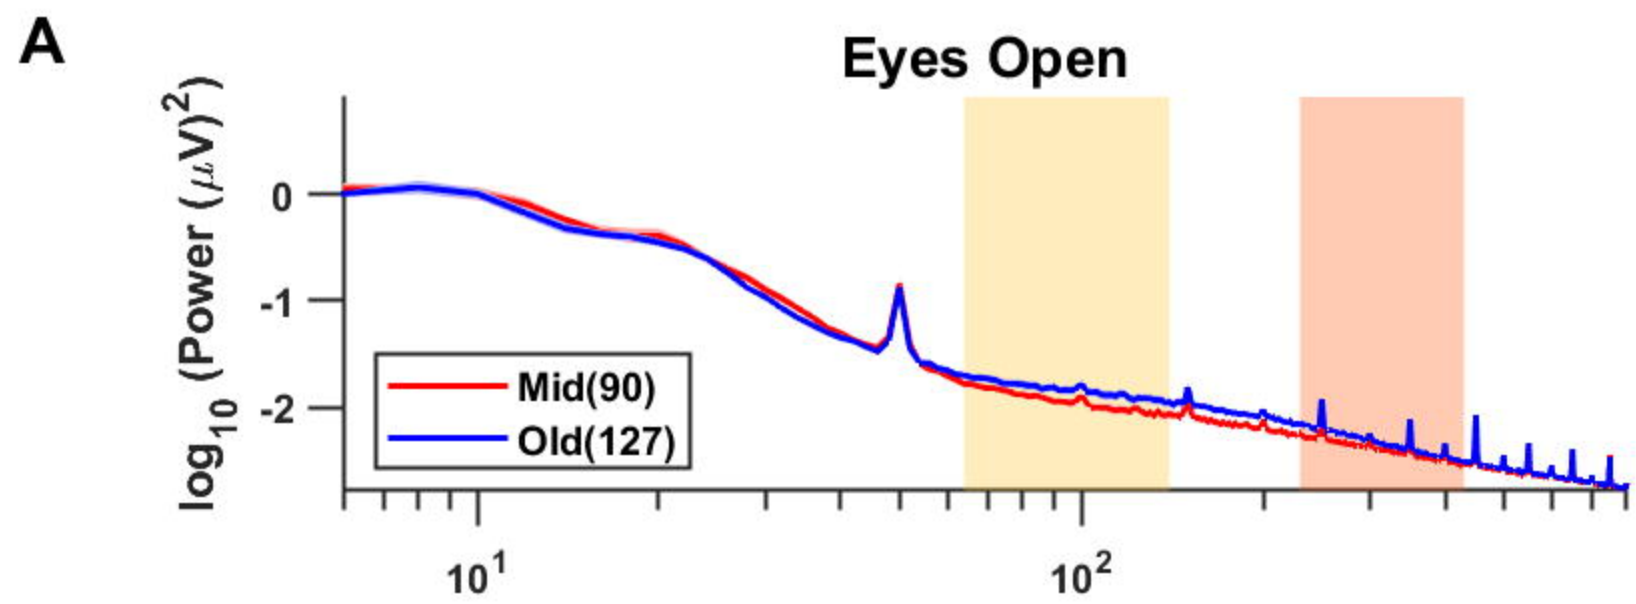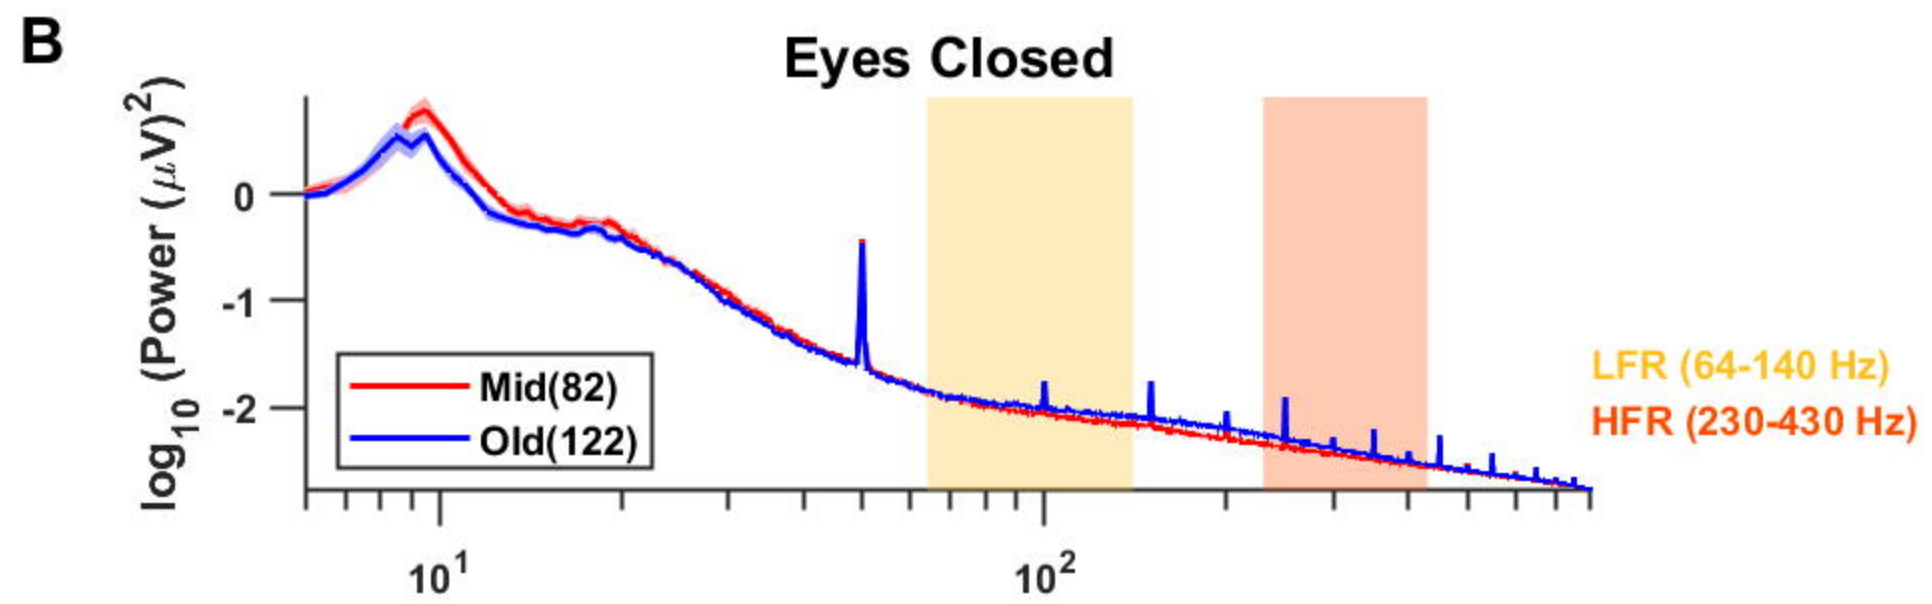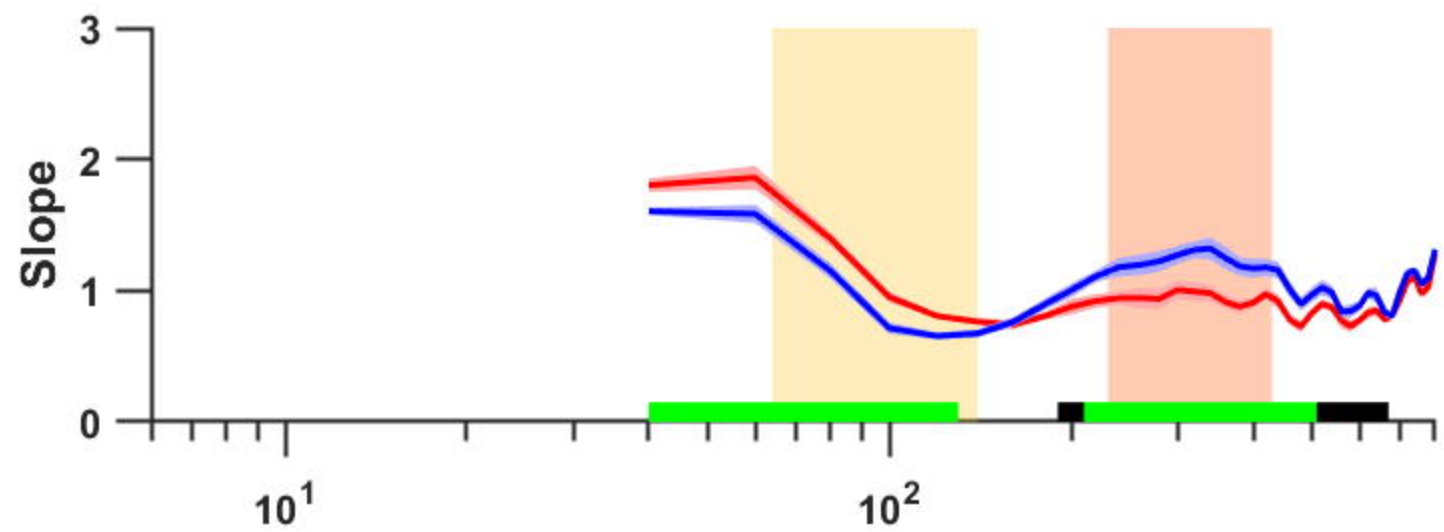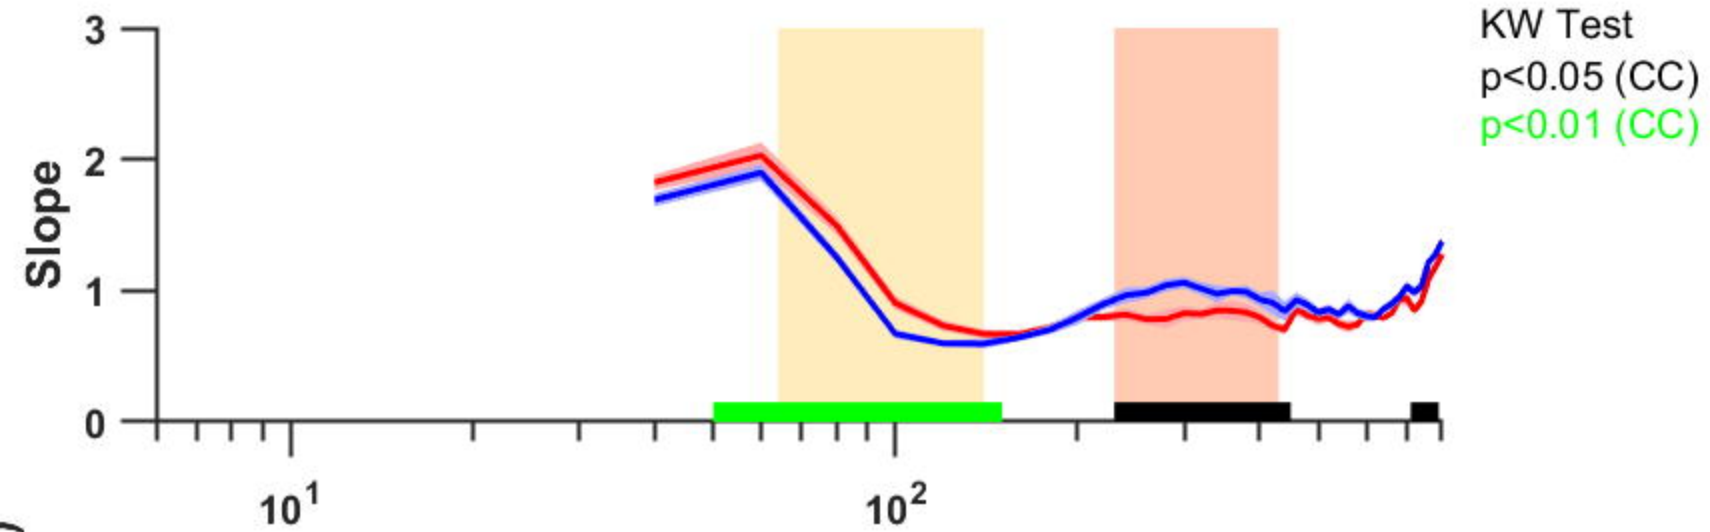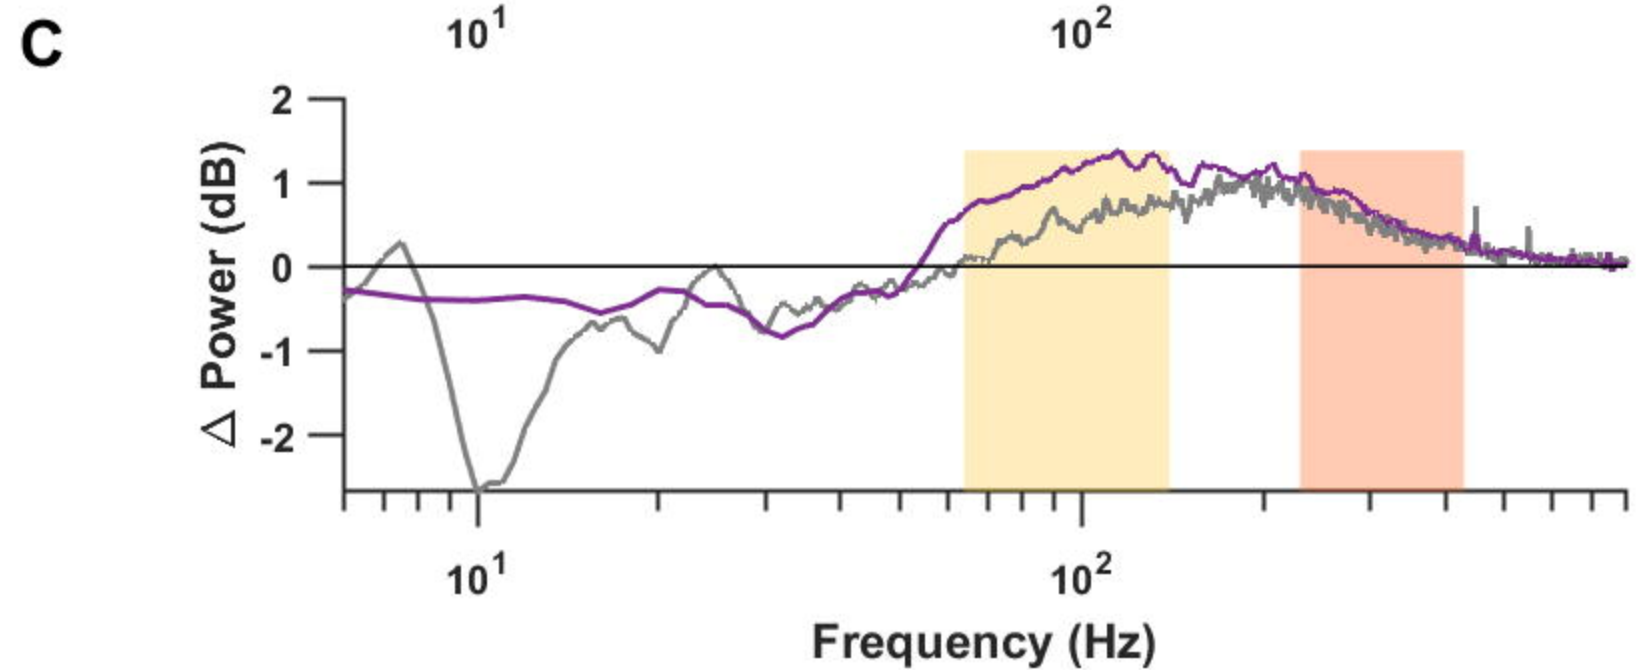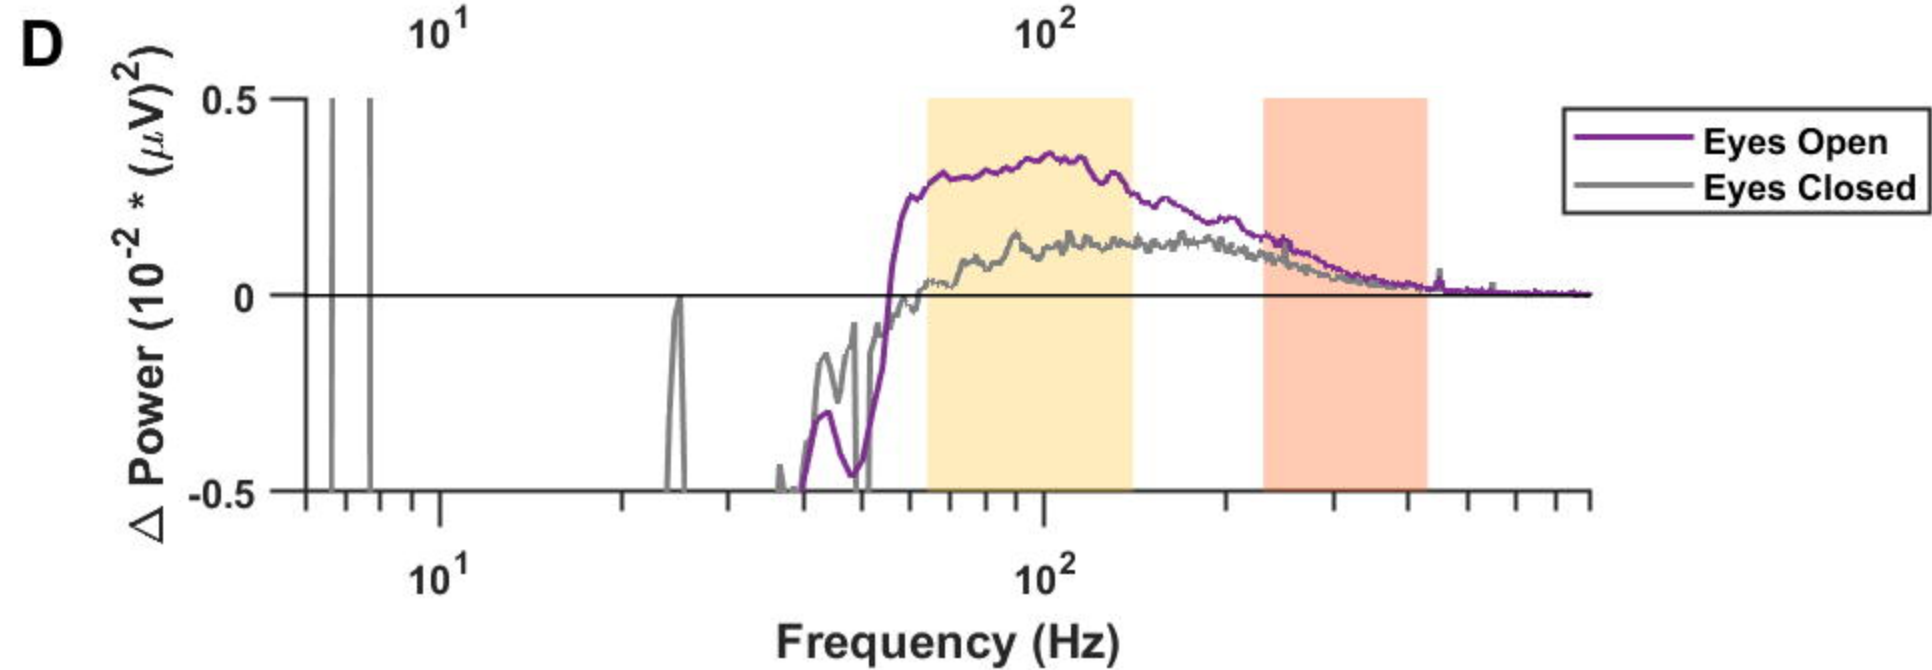

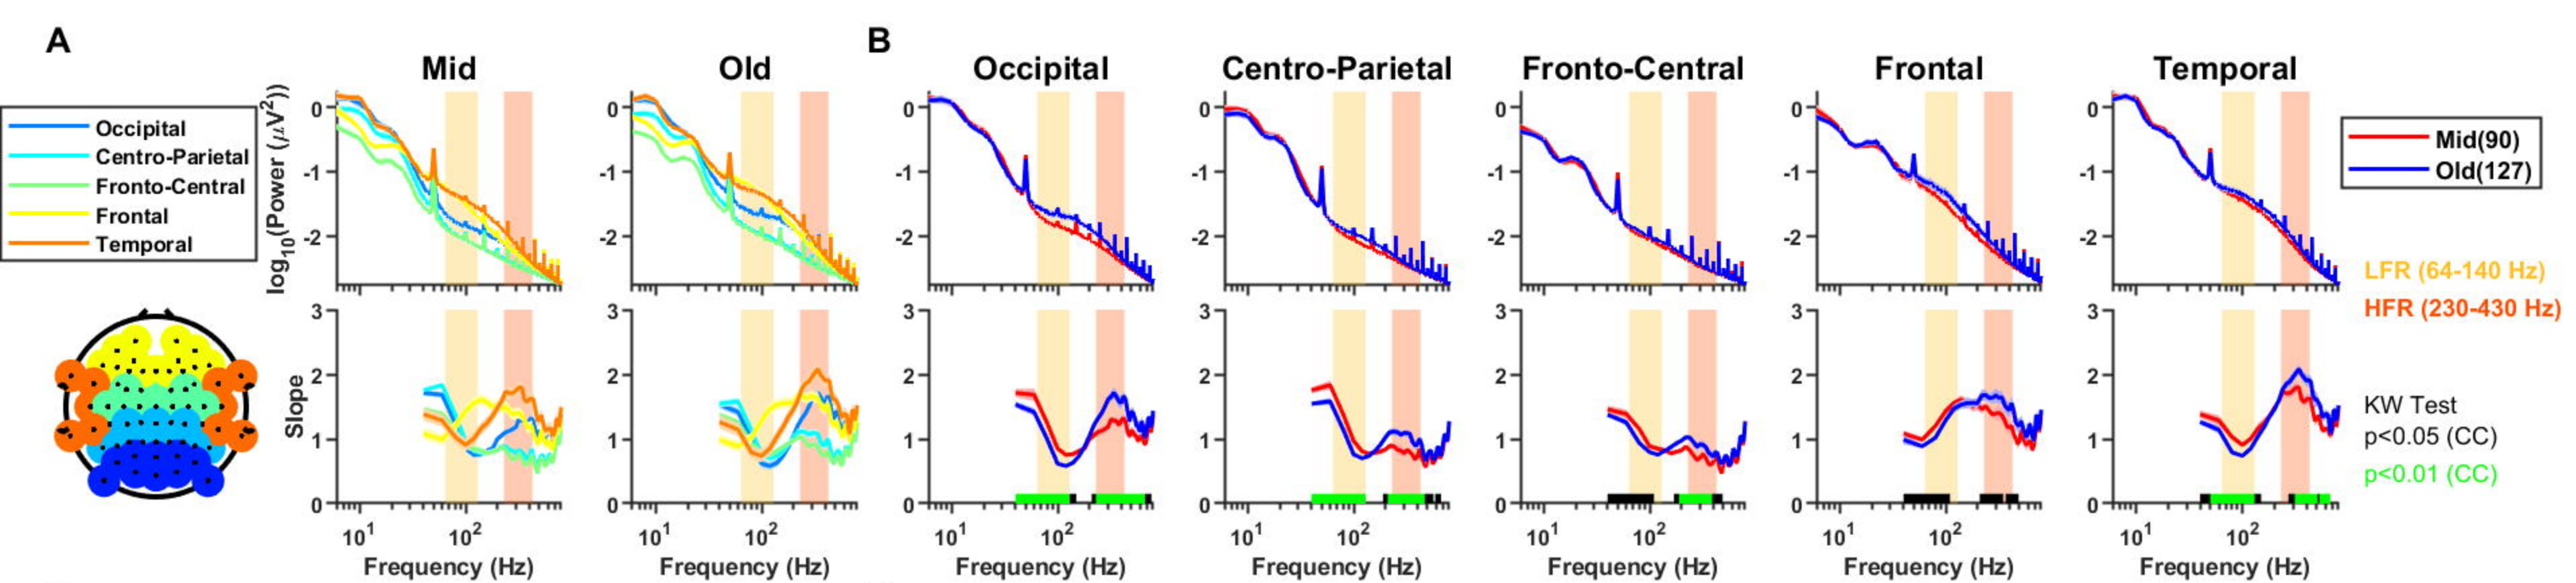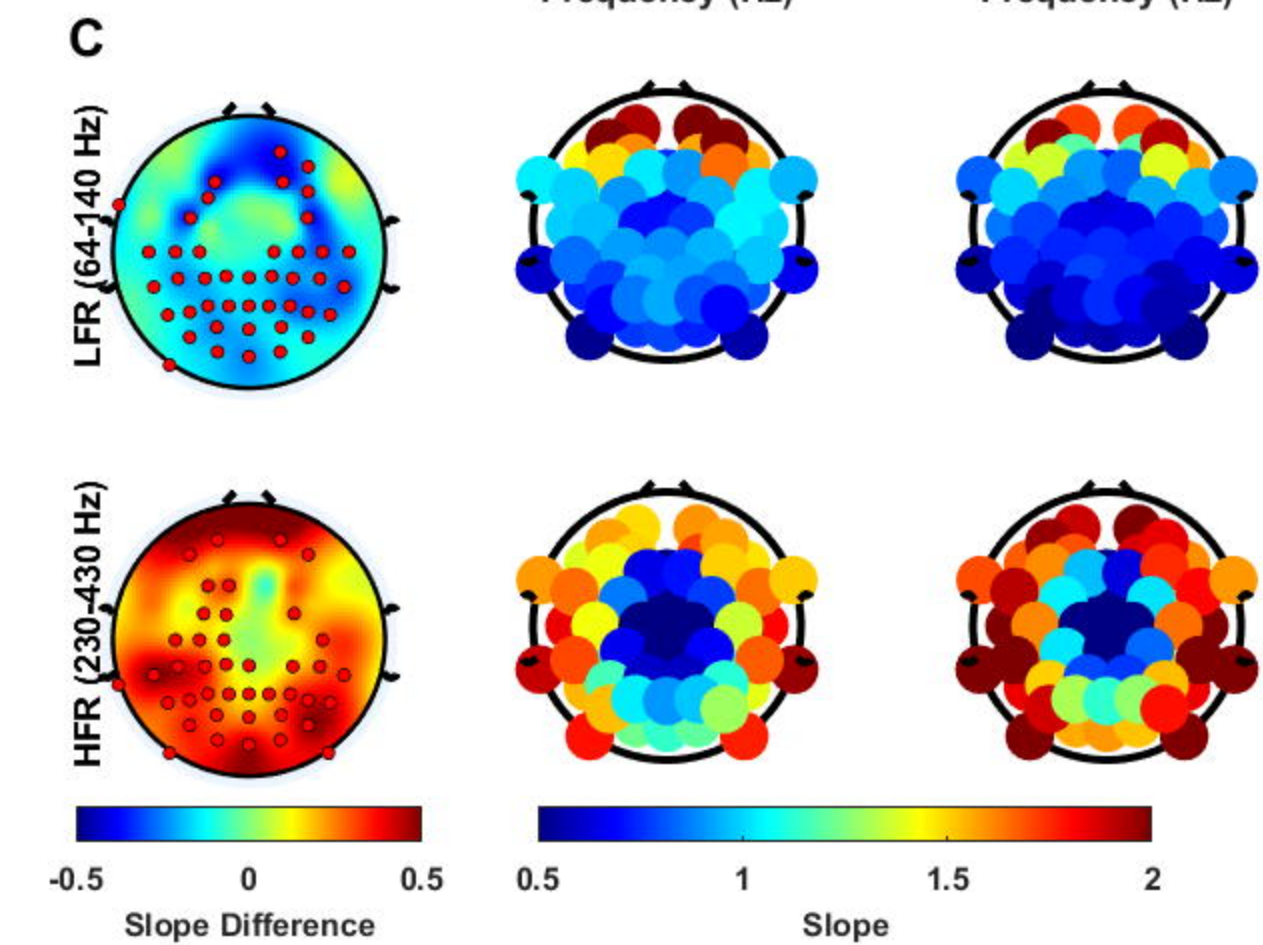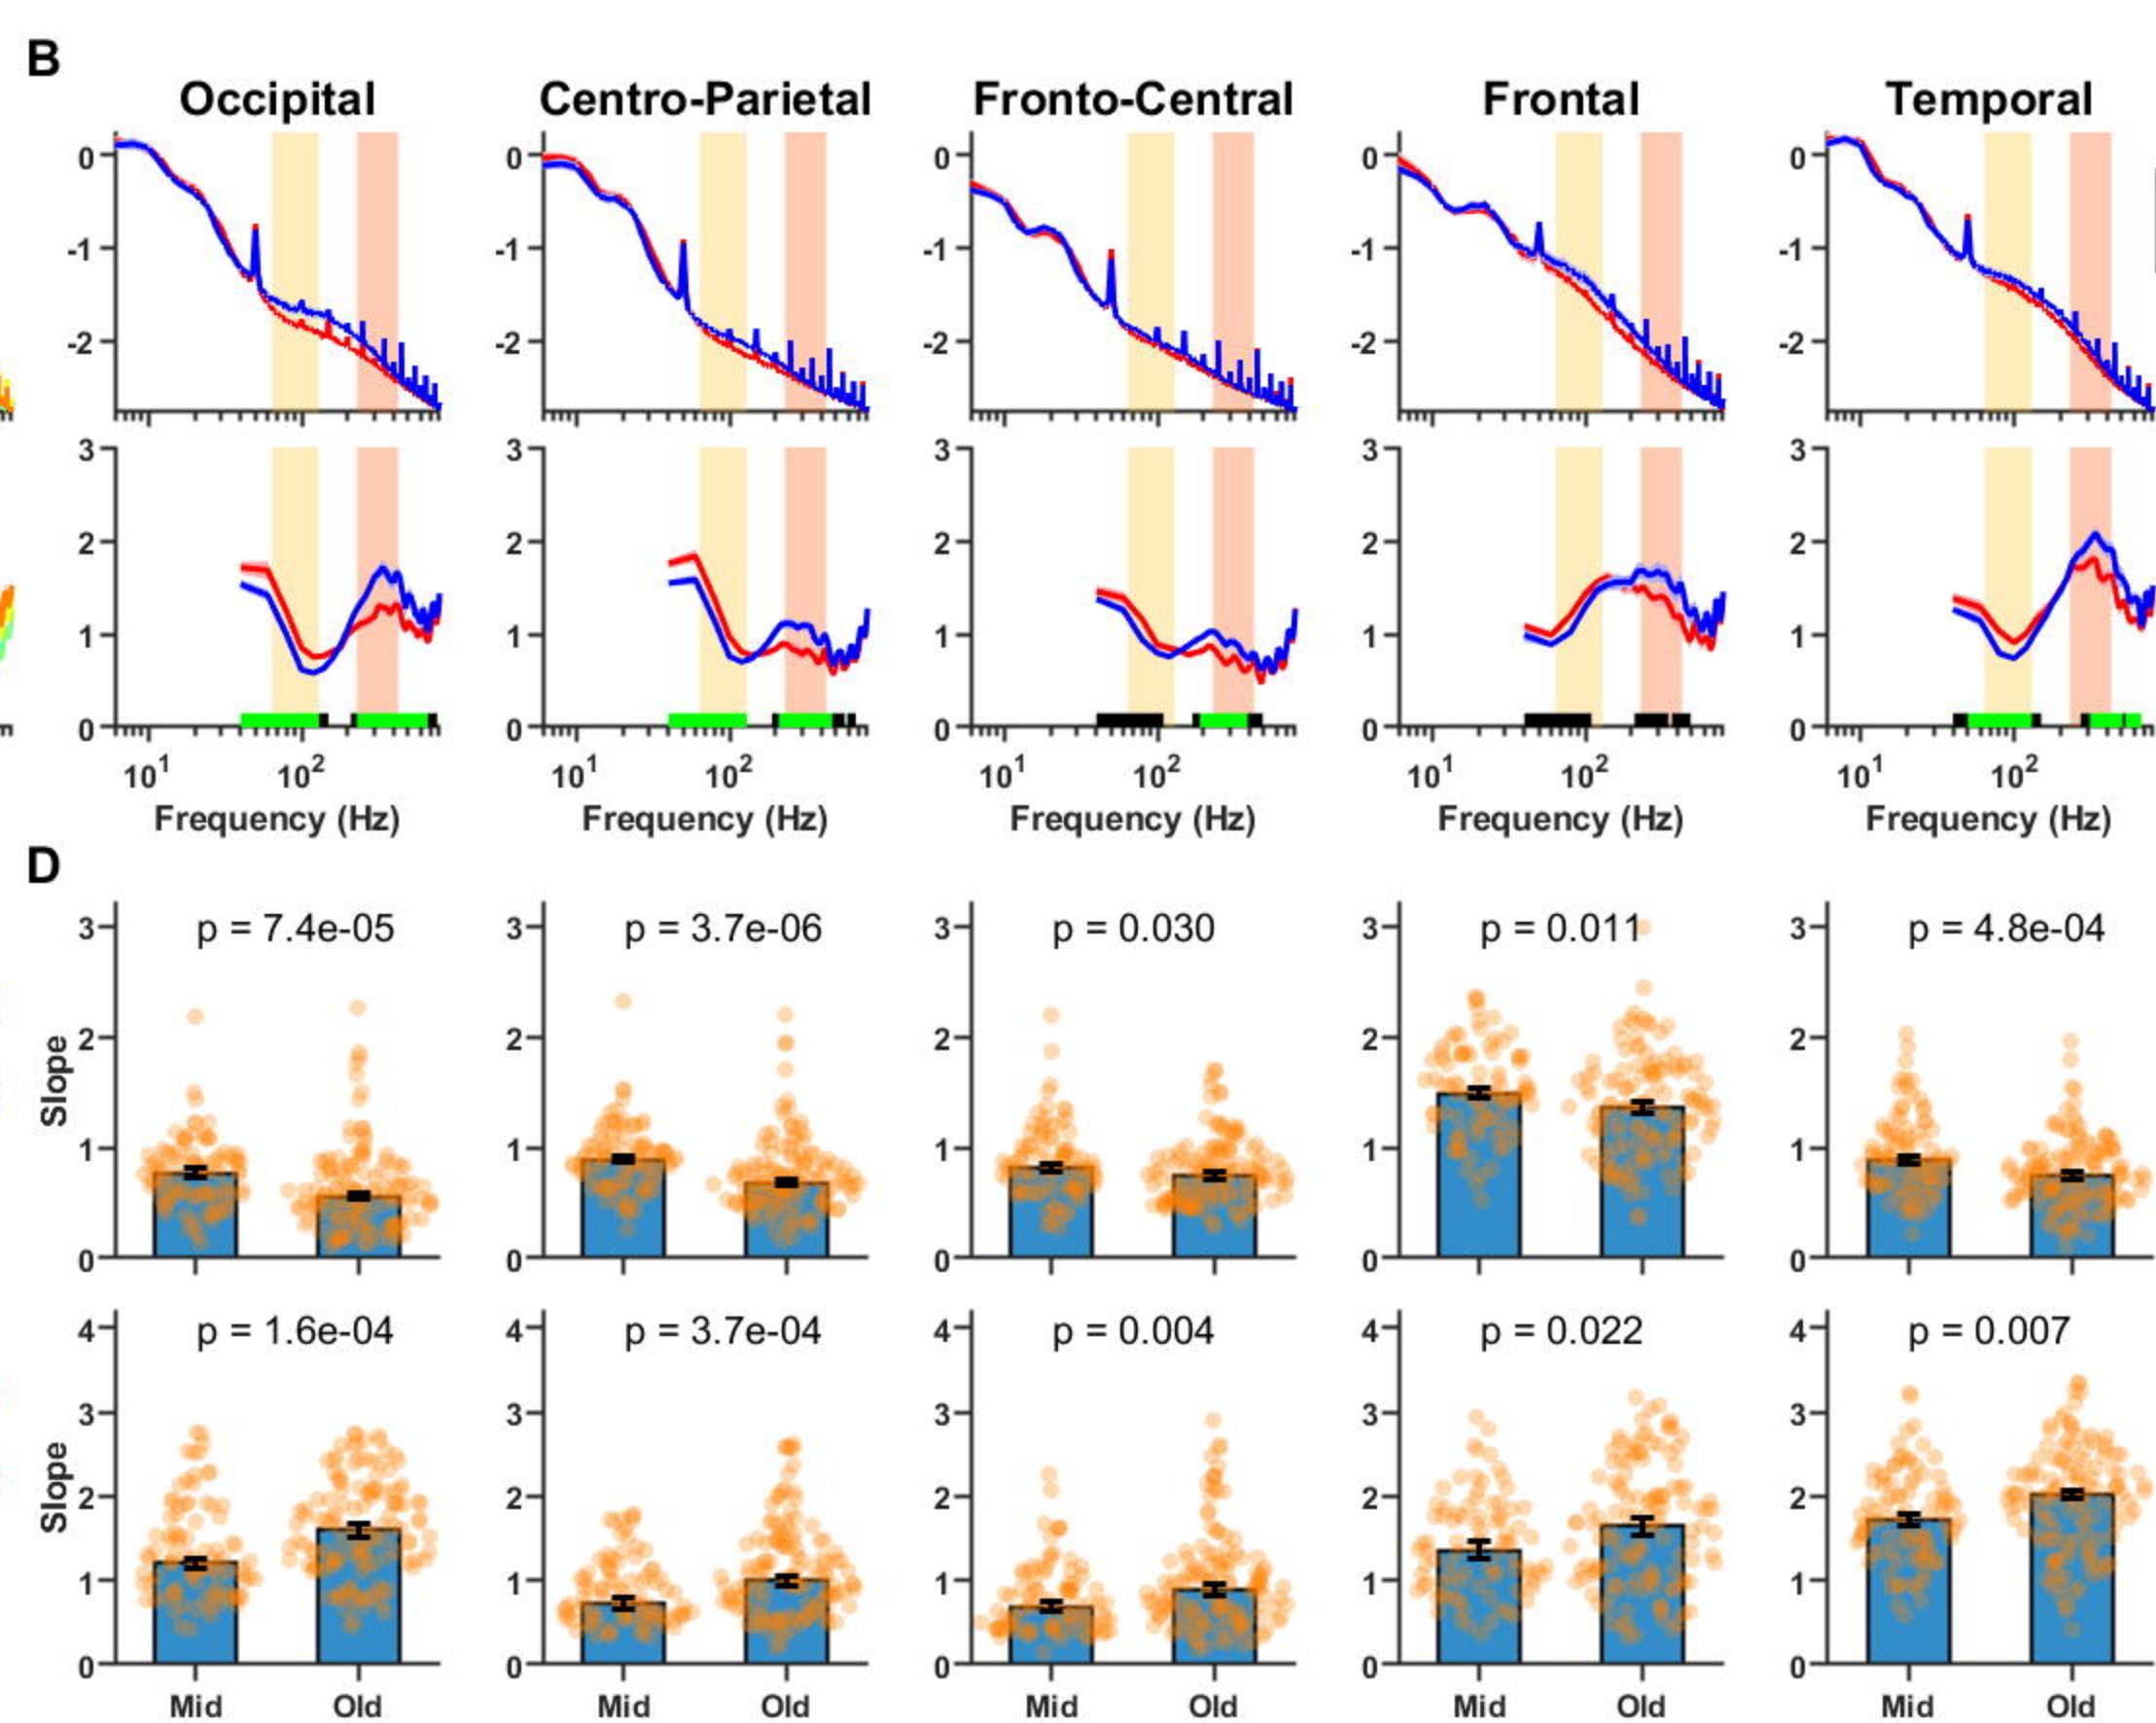

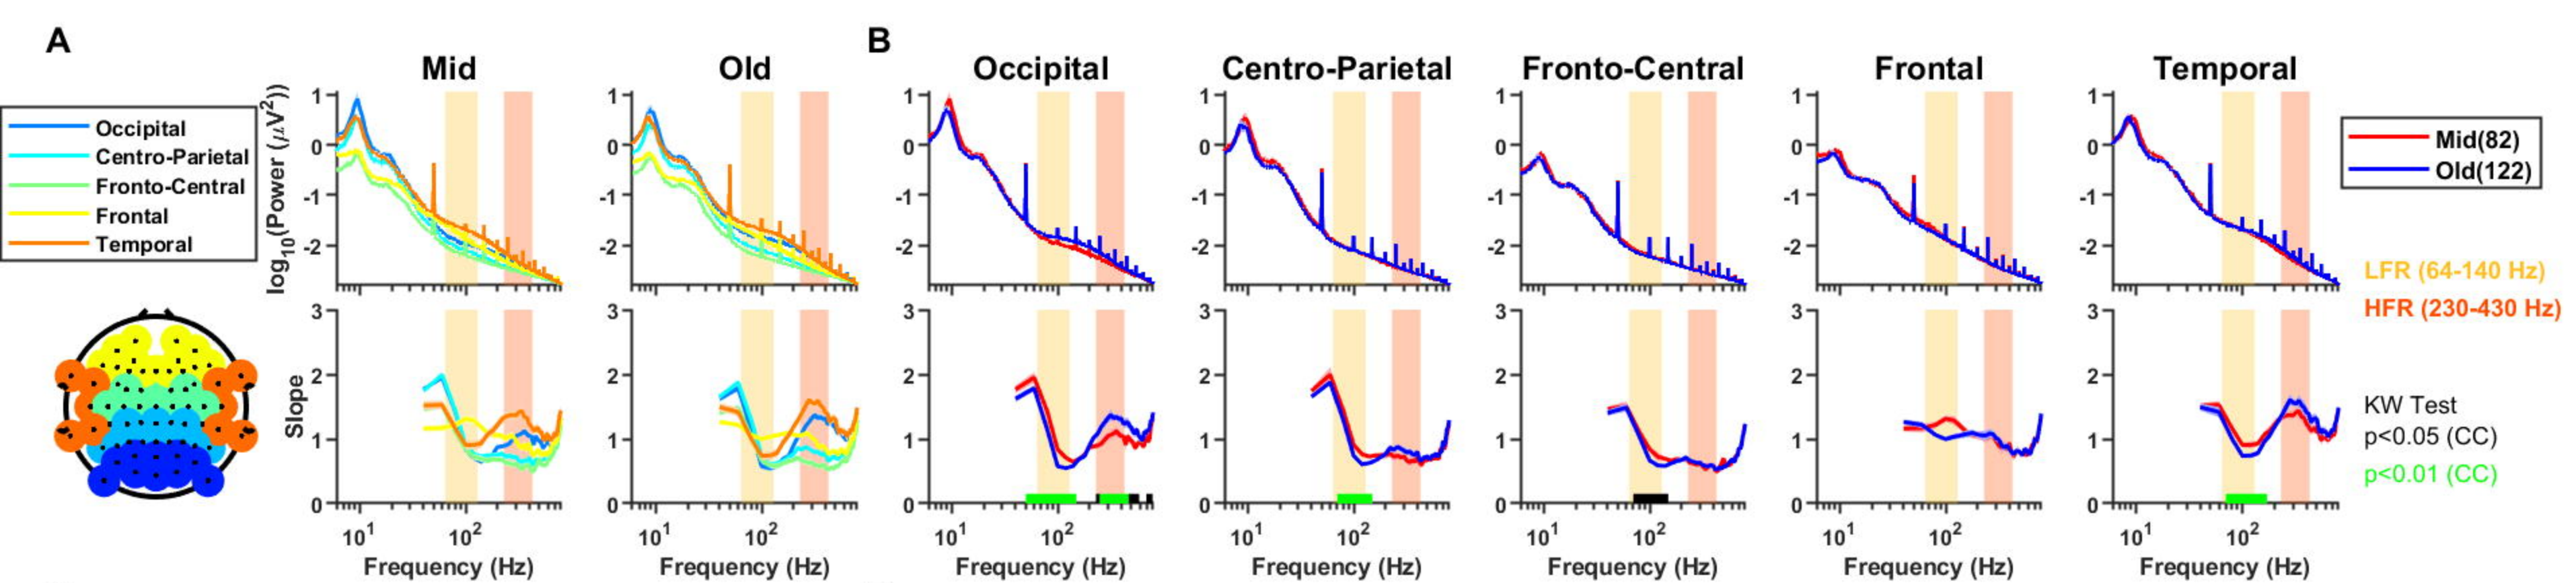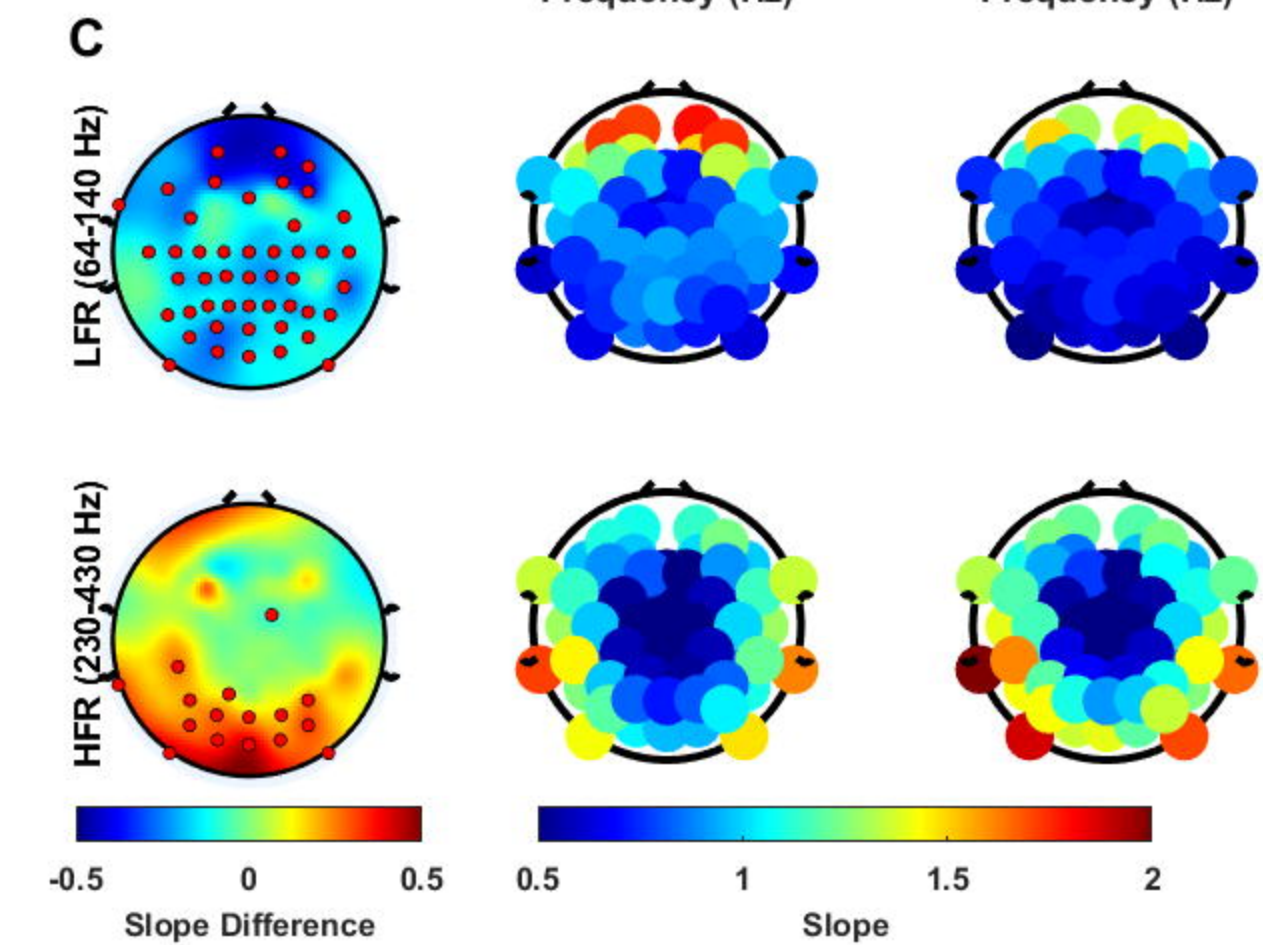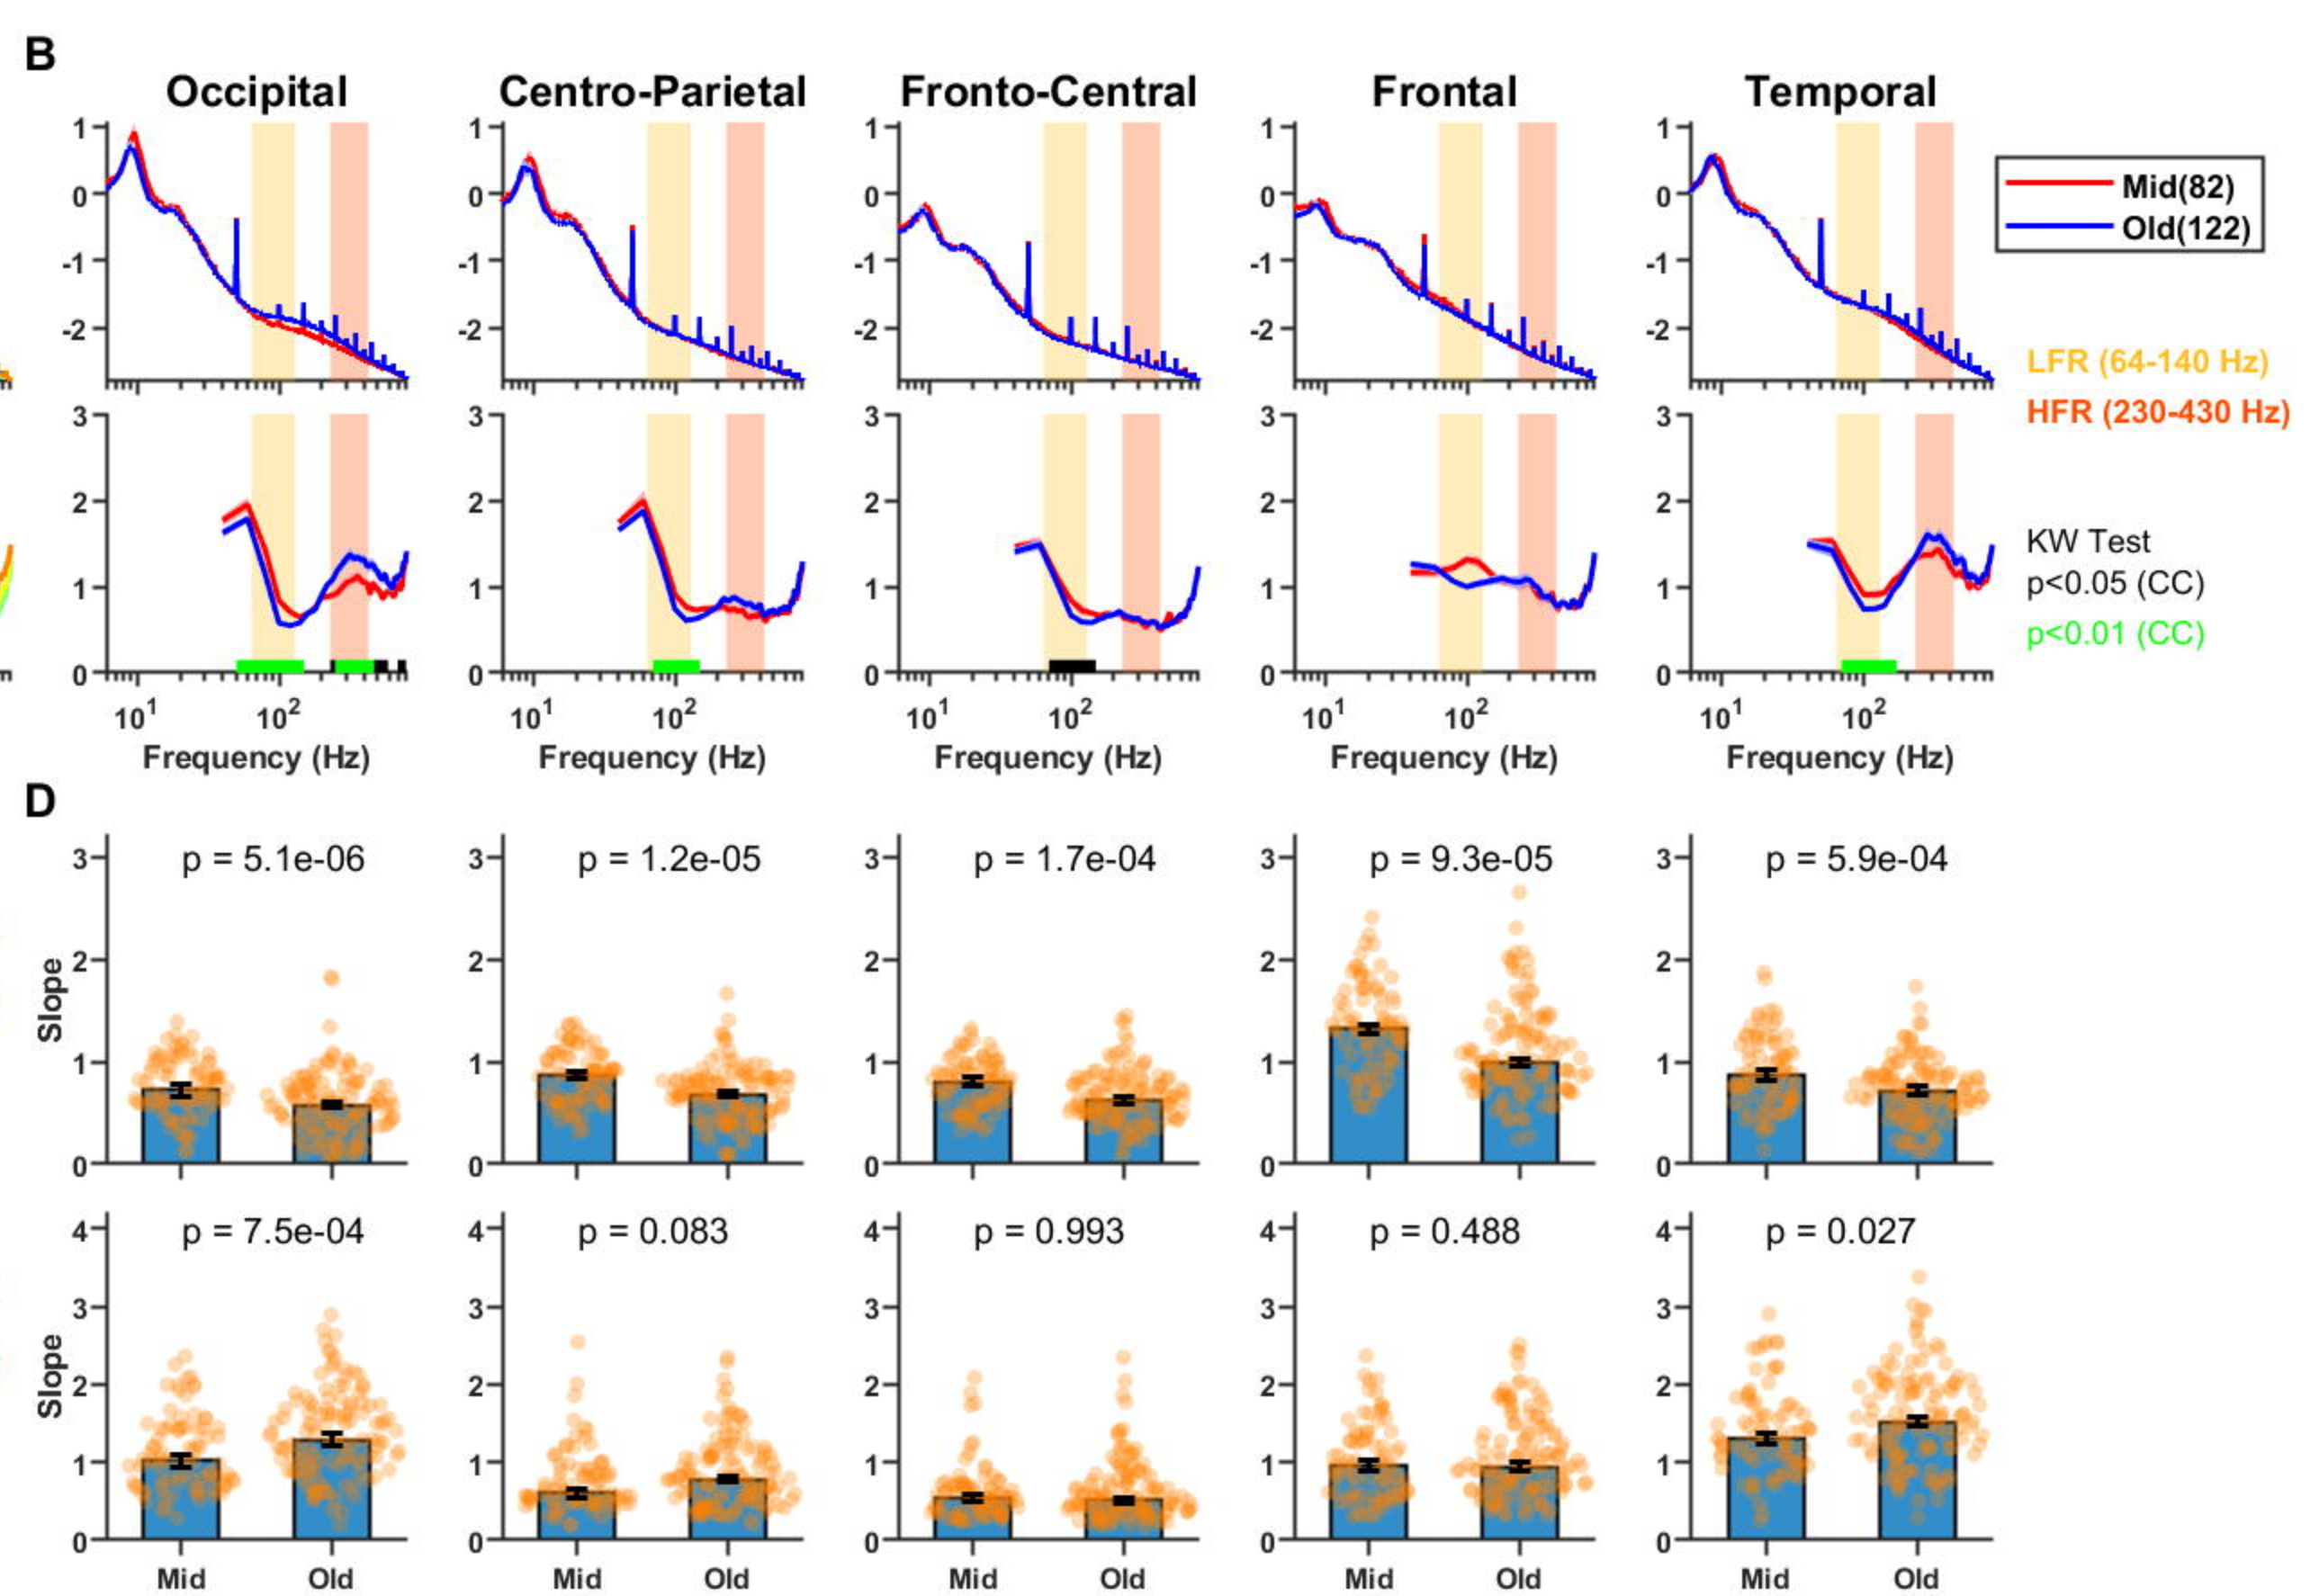

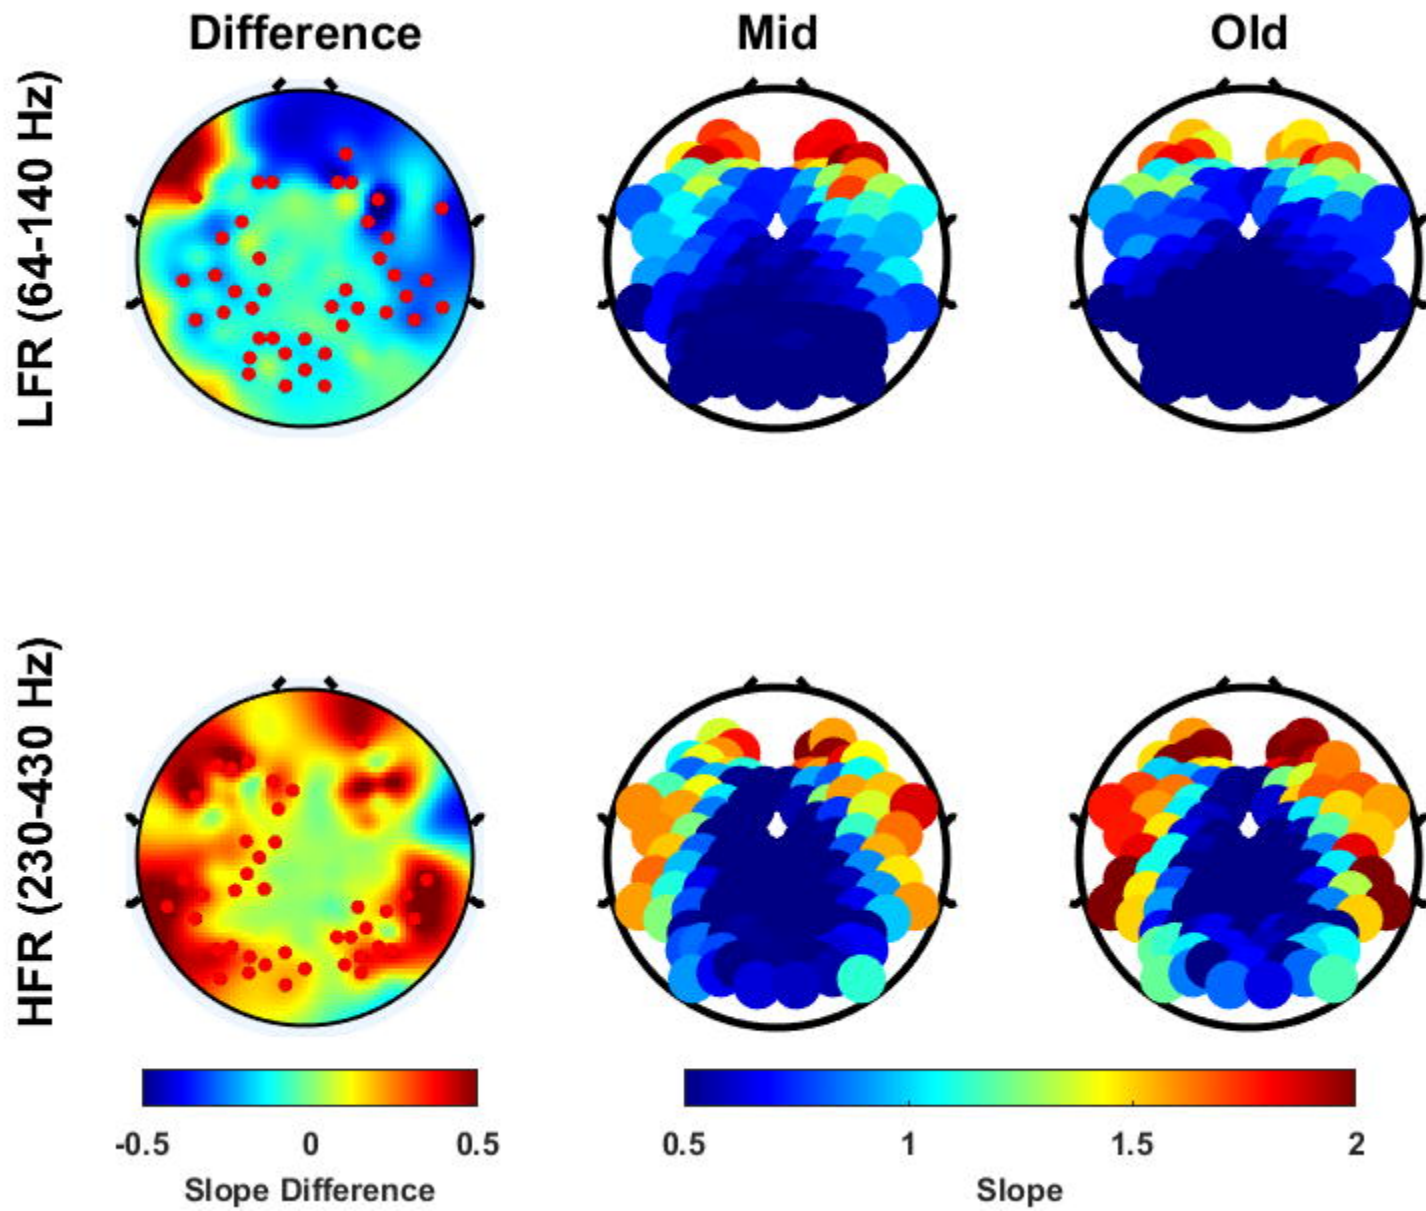

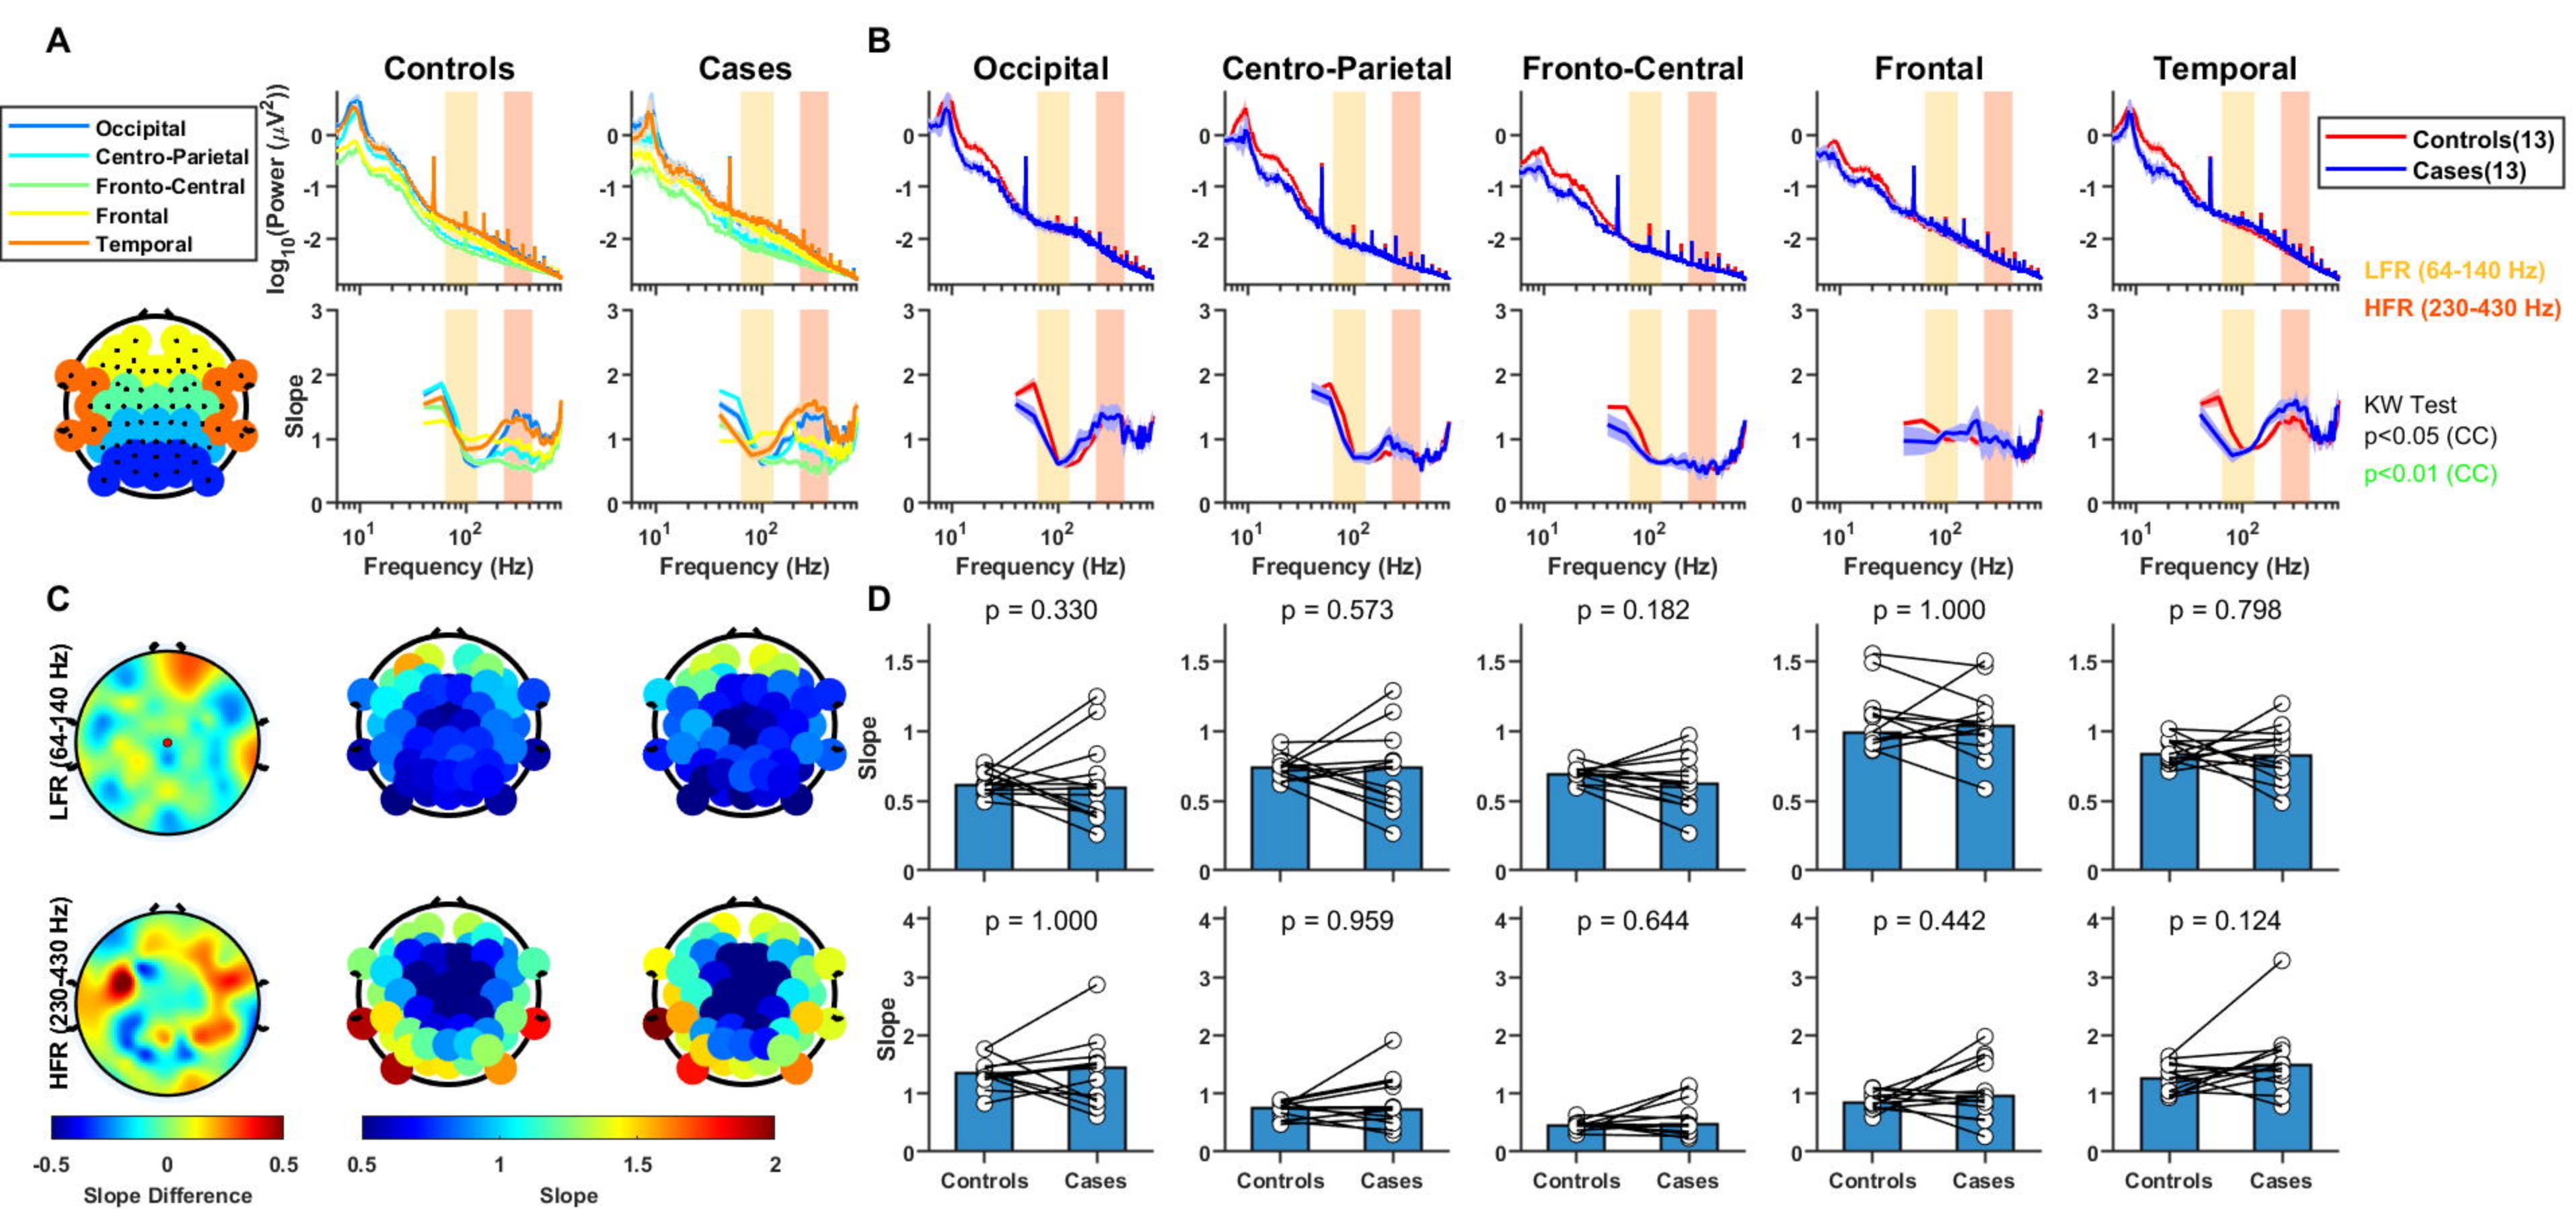

Baseline

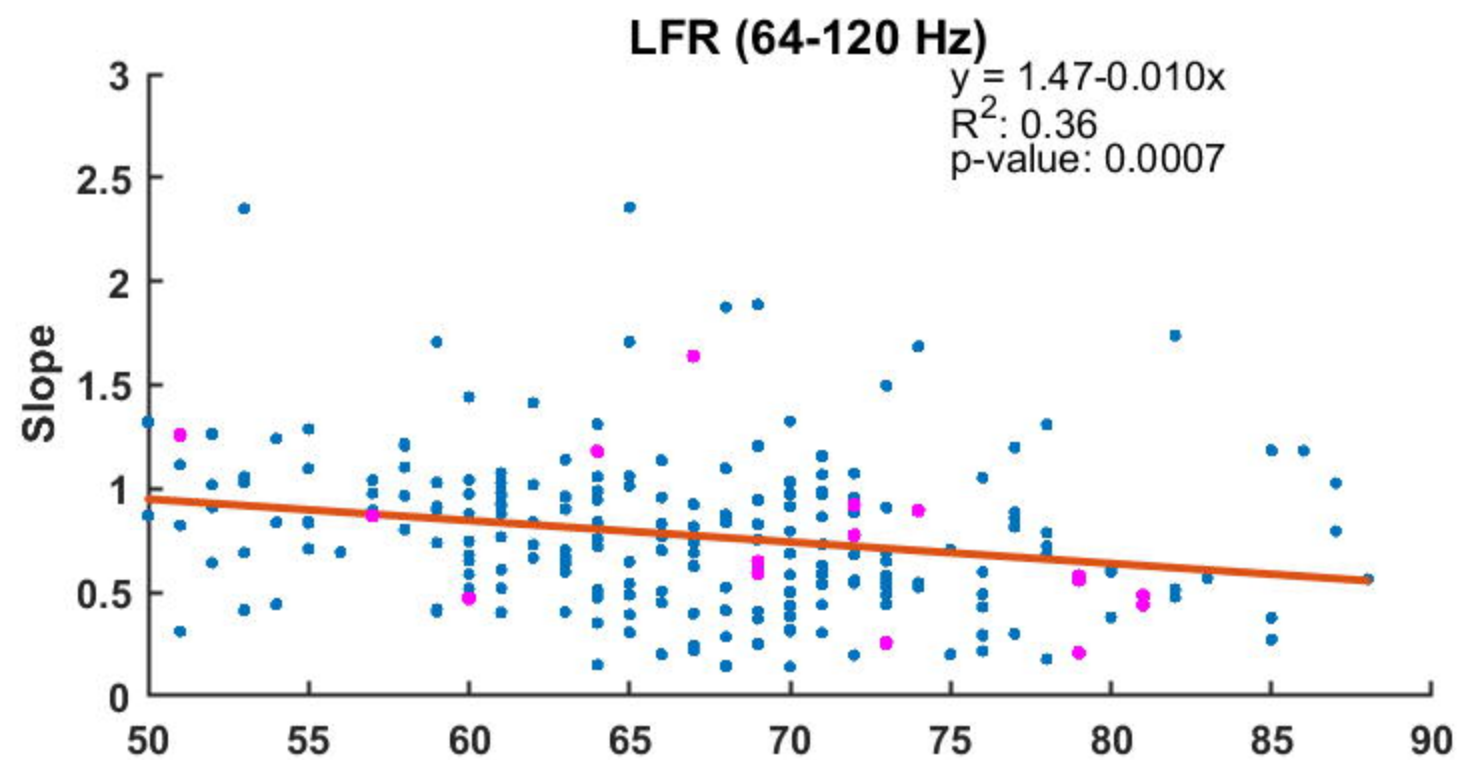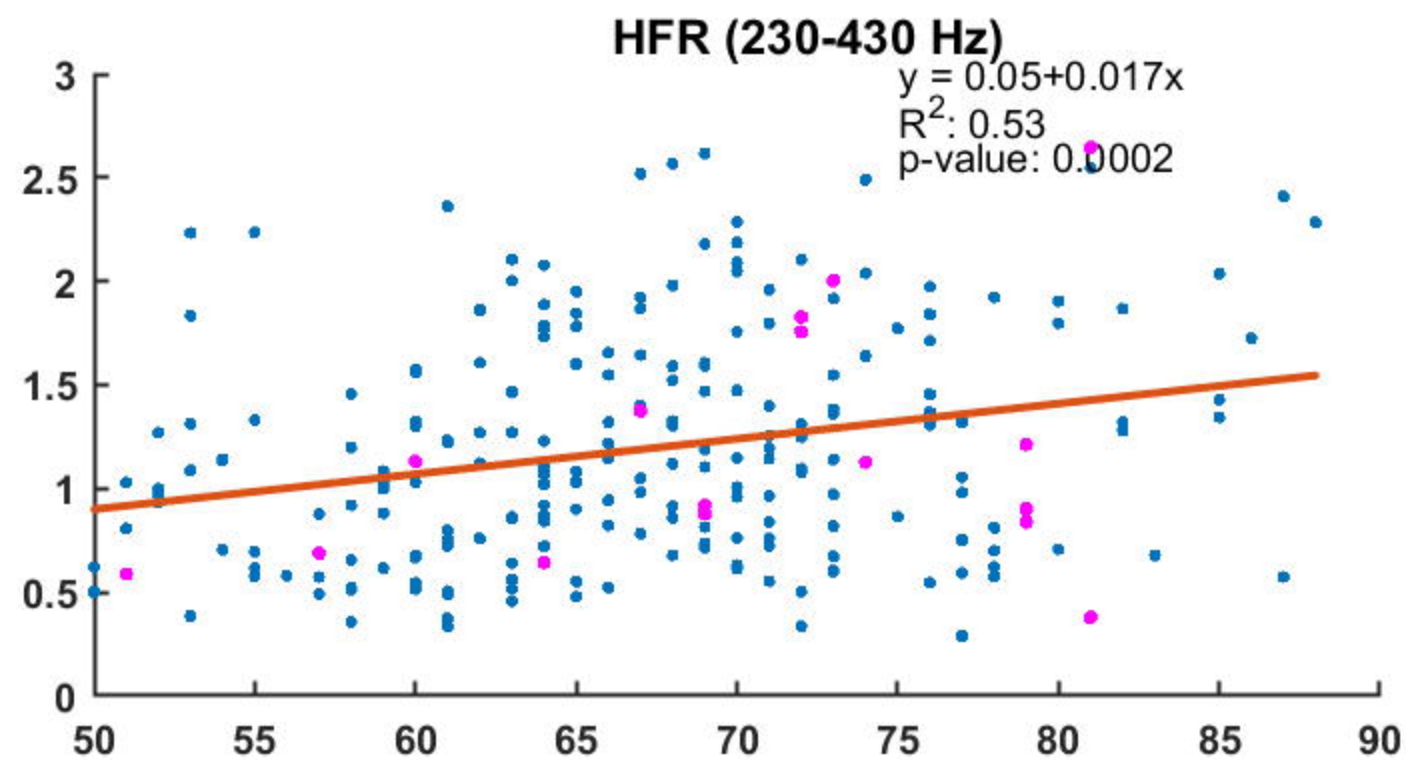

Eyes Closed

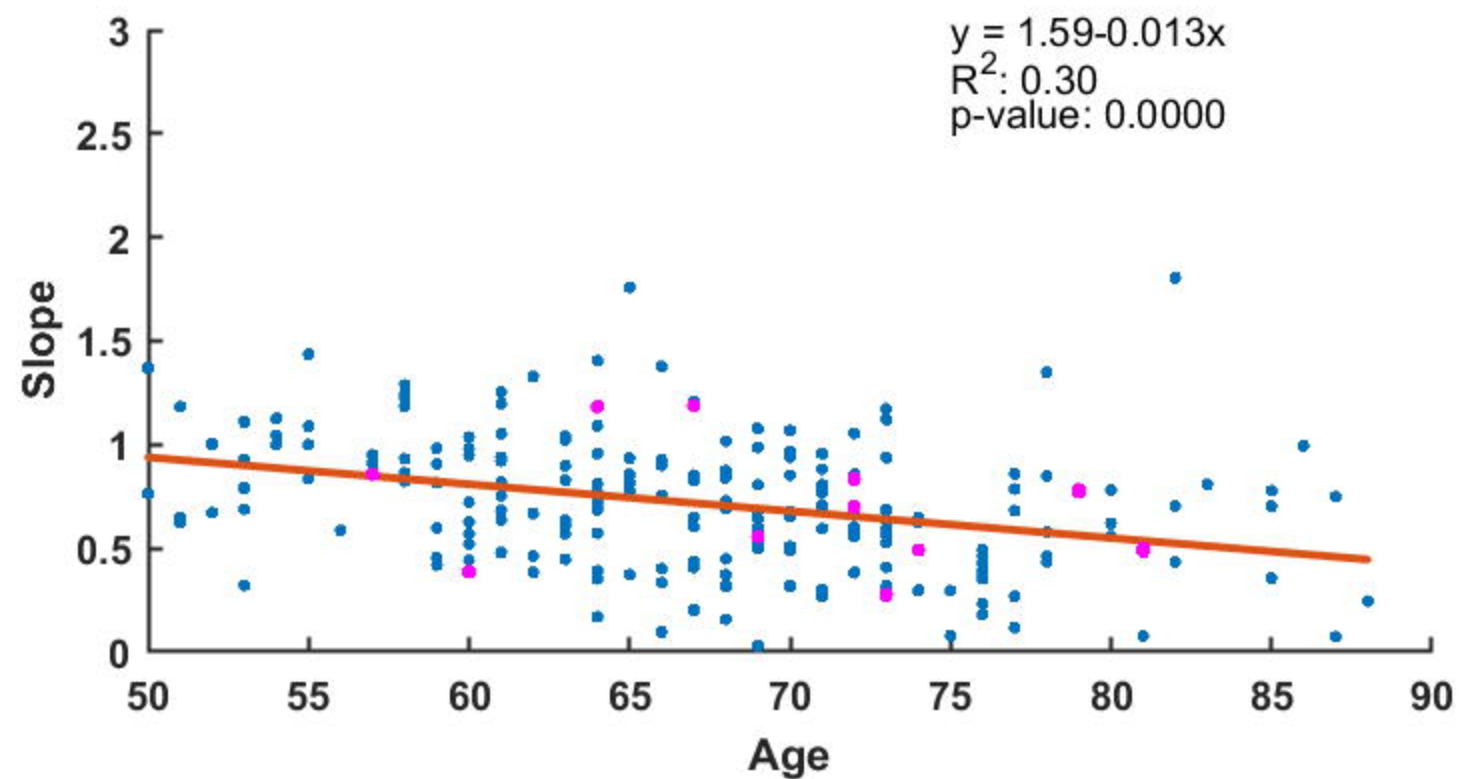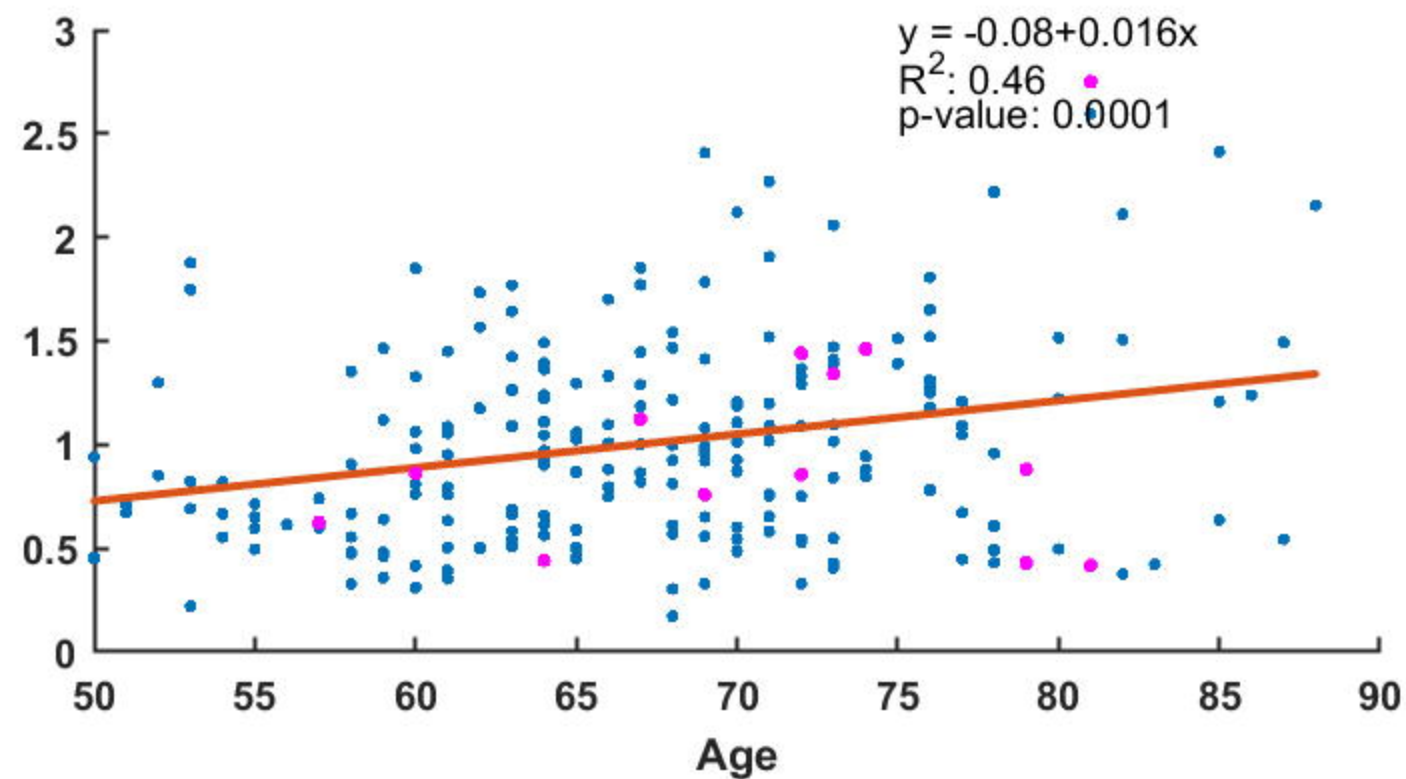

Source: https://www.biorxiv.org/content/biorxiv/early/2023/02/15/2023.02.15.528644.full.pdf?%3Fcollection=
